# Supplementary material for: ESRP1 regulates alternative splicing of CARM1 to sensitize small cell lung cancer cells to chemotherapy by inhibiting TGF-β/Smad signaling
Source: publisher site journal article supplement (doi:10.18632/aging.202295), 2021-01-20
Supplement: Supplementary file [file aging-v13i3-202295-supplementary-material-SD1.pdf]

SUPPLEMENTARY FIGURE

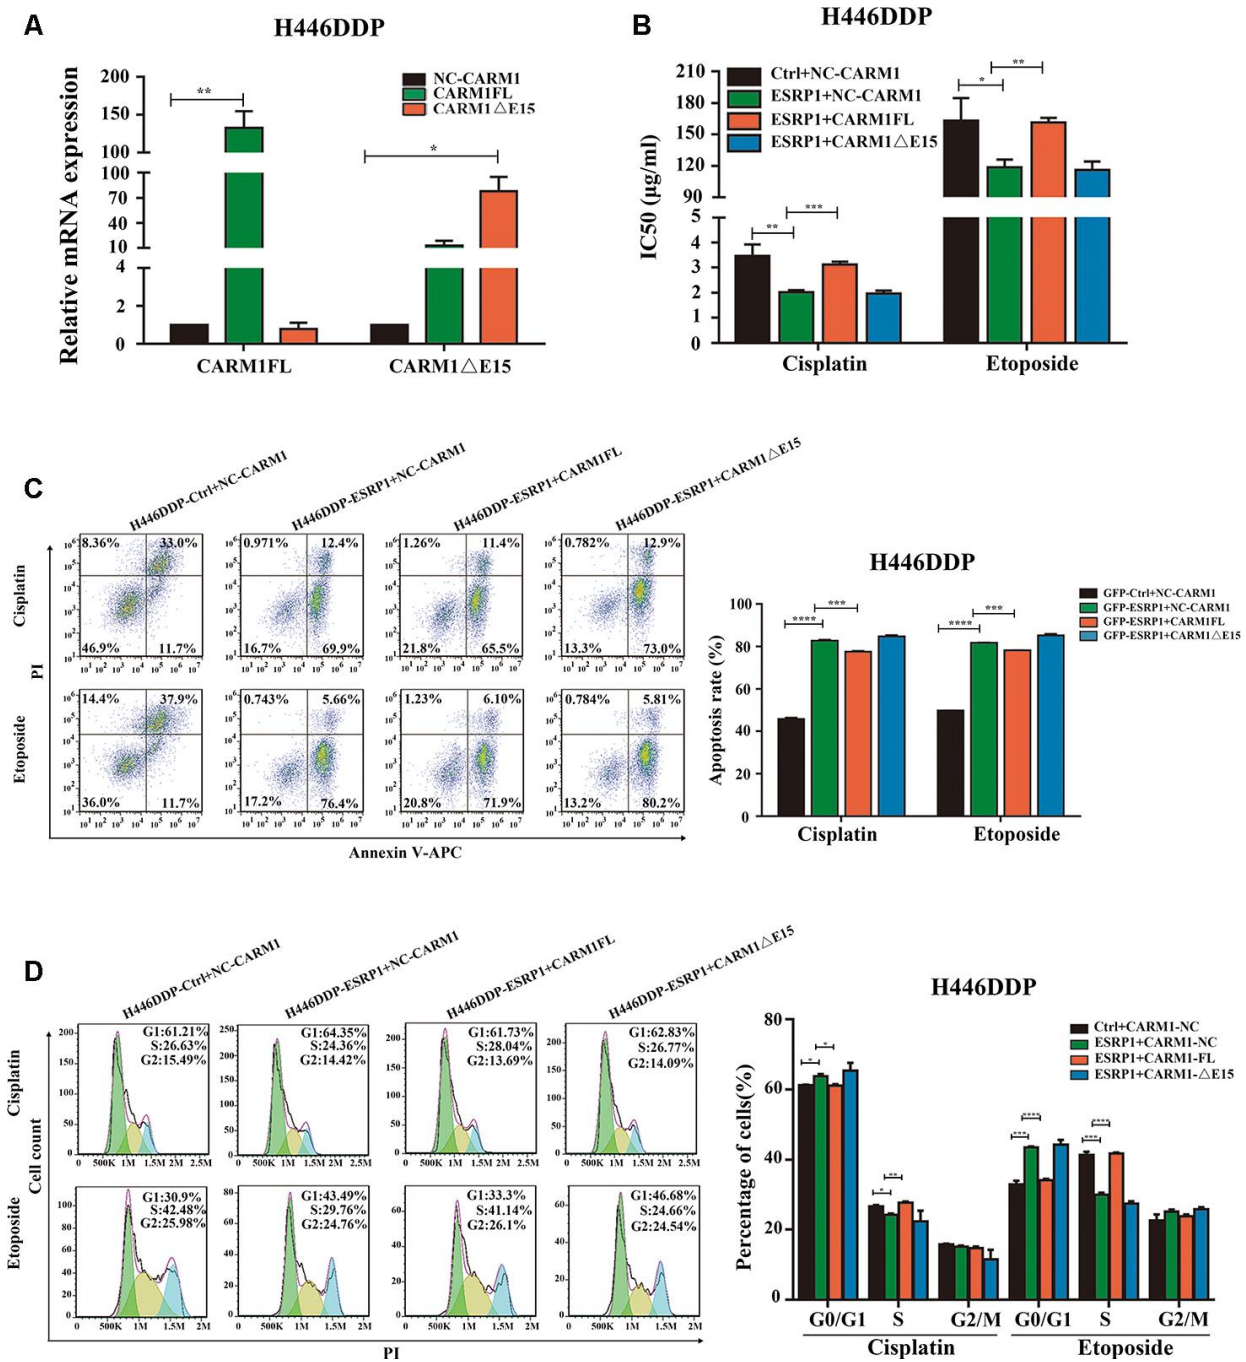

**Supplementary Figure 1. ESRP1 mediates chemoresistance of SCLC by regulating alternative splicing of CARM1.** (A) Transfected plasmids in H446DDP cells to up-regulate the expression of CARM1FL and CARM1ΔE15, using qRT-PCR assay to detect down-regulation efficiency. (B) Through CCK8 assay to detect IC50 value of cisplatin and etoposide after up-regulation of CARM1 in H446DDP cells. (C) Cell apoptosis was analyzed by flow cytometry after H446DDP cells were treated with cisplatin or etoposide for 24 hours. (D) Cell cycle arrest was analyzed by flow cytometry after H446DDP cells were treated with cisplatin or etoposide for 24 hours. \*,  $p < 0.05$ ; \*\*,  $p < 0.01$ ; \*\*\*,  $p < 0.001$ ; \*\*\*\*,  $p < 0.0001$ .
