# Supplementary material for: ESRP1 regulates alternative splicing of CARM1 to sensitize small cell lung cancer cells to chemotherapy by inhibiting TGF-β/Smad signaling
Source: publisher site journal article supplement (doi:10.18632/aging.202295), 2021-01-20
Supplement: Supplementary file [file aging-v13i3-202295-supplementary-material-SD2.pdf]

## SUPPLEMENTARY TABLE

**Supplementary Table 1. PCR primer sequences and siRNA sequences.**

---

### **qRT-PCR primer**

GARDH-Forward: ACAACTTTGGTATCGTGGAAGG  
GARDH-Reverse: GCCATCACGCCACAGTTTC  
ESRP1-Forward: TGCGTTGAGGAAGCATAAAG  
ESRP1-Reverse: GGGTTGGAAGTGAATGAGA  
CARM1-Forward: ACGTTGCTTTCATCGGCTCC  
CARM1-Reverse: CTTGGCGAACAGTGGTGACT  
CARM1FL-Forward: TGTCAATCACACCCACTCCC  
CARM1FL-Reverse: CTAGCTCCCGTAGTGCATGG  
CARM1ΔE15-Forward: CACAACAACCTGATTCCTTTAGG  
CARM1ΔE15-Reverse: TTGGTCGGGATGGACATGGG

---

### **RT-PCR primer**

GARDH-Forward: ACAACTTTGGTATCGTGGAAGG  
GARDH-Reverse: GCCATCACGCCACAGTTTC  
CARM1-Forward: GATGCCGACCGCCTATGACT  
CARM1-Reverse: GCGGGCAGGGACATCATTTG  
RAC1-Forward: CAGCACGTGTTCCCGACATA  
RAC1-Reverse: GAGGCATGGCAGGTGTAAGA  
DNMT3B-Forward: GGAGTCTGCACGGGACCTAT  
DNMT3B-Reverse: ATCTCCAAAGGGAGCACCGA  
PBX1-Forward: CAGCATCATCCACCGCAAGT  
PBX1-Reverse: GCTTCCATGGGCTGACACAT  
CARS-Forward: CAGTTGCACGCAGAAGTCAG  
CARS-Reverse: TCCAGCATGTTAGCAGTGGG  
VPS28-Forward: CGTCCAGGTCTCAGTGCTGT  
VPS28-Reverse: TTGTATTGGACCAGGAGCCG  
CKMT1B-Forward: CCACGAGGAAGGCAGAGATT  
CKMT1B-Reverse: GACTGGCCATGCAGTTGTTG  
STAG3L1-Forward: GCAGCAAAACGACCACTGAA  
STAG3L1-Reverse: CCTTCCAACCTCCAAGTTTCCC  
ZNF451-Forward: CCCTGAGGCATCTGAGTCAA  
ZNF451-Reverse: GGTCCACACACAGTCTTGCT  
EYA4-Forward: CAAGAGGGATGCCTGGCTAC  
EYA4-Reverse: GGGCATGTTGTGCTAGTGCT

---

### **siRNA sequence (5'-3')**

siRNA-CARM1FL: GGATTGTCAATCACACCCATT  
siRNA-CARM1ΔE15: CUGAUUCCUUUAGGGUCCUTT  
siRNA-CARM1: GGACAAGAUCGUUCUUGAUTT  
shESRP1#1: GACAGCATTGCCCTATTAC  
shESRP1#2: ATAAAGACTTGTTGGGTAA

---
