# Supplementary material for: ESRP1 regulates alternative splicing of CARM1 to sensitize small cell lung cancer cells to chemotherapy by inhibiting TGF-β/Smad signaling
Source: Aging (Albany NY). 2021 Jan 20;13(3):3554–72. doi: 10.18632/aging.202295 (PMC7906186; doi:10.18632/aging.202295)
Supplement: Supplementary Table 2 [file aging-13-202295-s003.xls]

## Sheet: SE
Supplementary Table 2. Alternative splicing events related to ESRP1.
	GeneID	Chr	Strand	skipExonStart	skipExonEnd	upstreamExonStart	upstreamExonEnd	downstreamExonStart	downstreamExonEnd	H69AR-Ctrl-IC	H69AR-Ctrll-SC	H69AR-ESRP1-IC	H69AR-ESRP1-SC	Pvalue	FDR	InclusionTranscripts	SkippingTranscripts
ACLY	47	NC_000017.11	-	41896619	41896649	41893032	41893174	41897748	41897839	208	130	266	39	4.74974e-08	2.92293e-05	NM_001303274.1_dup1,NM_001096.2_dup1,XM_005257395.1_dup1	XM_017024688.1_dup1,NM_198830.1_dup1,NM_001303275.1_dup1
ACTN4	81	NW_014040929.1	+	137581	137662	136592	136739	137951	138017	569	7	27	10	2.78864e-06	0.00111538	BGI_novel_T024463,XM_017027331.1_dup1	NM_001322033.1_dup1,XM_005259281.4_dup1
ANXA6	309	NC_000005.10	-	151110626	151110644	151109752	151109846	151117126	151117180	24	15	17	73	4.65758e-05	0.0134513	NM_001155.4_dup1,NM_001193544.1_dup1	XM_005268432.4_dup1
APLP2	334	NC_000011.10	+	130123611	130123779	130122304	130122513	130126699	130126830	791	424	1347	370	2.43181e-08	1.52064e-05	NM_001642.2_dup1,NM_001142276.1_dup1,NM_001243299.1_dup1	BGI_novel_T013829,NR_024516.1_dup1,NM_001142277.1_dup1,NR_024515.1_dup1
BCS1L	617	NC_000002.12	+	218660036	218660421	218659669	218659743	218660938	218661307	232	27	234	2	1.85953e-05	0.00625437	XM_017004631.1_dup1	NA
	617	NC_000002.12	+	218660036	218660245	218659655	218659743	218660938	218661307	84	27	86	2	2.57979e-05	0.00800945	NM_004328.4_dup1	NM_001257342.1_dup1,BGI_novel_T003861,BGI_novel_T003863,NM_001257343.1_dup1,NM_001079866.1_dup1
	617	NC_000002.12	+	218660036	218660482	218659655	218659743	218660938	218661307	248	27	242	2	2.81019e-05	0.00866418	BGI_novel_T003863	NM_001257342.1_dup1,BGI_novel_T003861,NM_004328.4_dup1,NM_001257343.1_dup1,NM_001079866.1_dup1
	617	NC_000002.12	+	218660036	218660166	218659655	218659743	218660938	218661307	46	27	50	2	3.03234e-05	0.009221	NM_001257342.1_dup1,BGI_novel_T003861	BGI_novel_T003863,NM_004328.4_dup1,NM_001257343.1_dup1,NM_001079866.1_dup1
	617	NC_000002.12	+	218660306	218660421	218659674	218659743	218660938	218661307	35	27	35	2	0.000108156	0.0291018	XM_017004632.1_dup1	NA
	617	NC_000002.12	+	218660036	218660218	218659655	218659743	218660938	218661307	72	27	64	2	0.000115469	0.0308824	NM_001257343.1_dup1	NM_001257342.1_dup1,BGI_novel_T003861,BGI_novel_T003863,NM_004328.4_dup1,NM_001079866.1_dup1
DST	667	NC_000006.12	-	56468981	56468999	56466077	56466195	56469882	56469957	20	56	41	4	1.71765e-09	1.19154e-06	XM_017011219.1_dup1,XM_017011217.1_dup1,XM_017011220.1_dup1,XM_017011215.1_dup1,XM_005249319.2_dup1,XM_017011205.1_dup1,XM_017011210.1_dup1,NM_001144770.1_dup1,XM_005249324.2_dup1,NM_183380.3_dup1,XM_017011218.1_dup1,XM_005249315.3_dup1,XM_017011216.1_dup1,XM_011514824.2_dup1,XM_017011212.1_dup1,XM_017011208.1_dup1,BGI_novel_T007876,XM_005249316.2_dup1,XM_017011214.1_dup1,XM_017011222.1_dup1,XM_0…	BGI_novel_T007877,BGI_novel_T007878,BGI_novel_T007874,XM_017011206.1_dup1,BGI_novel_T007875,XM_017011209.1_dup1,BGI_novel_T007879
SCARB1	949	NC_000012.12	-	124782682	124782811	124777627	124778586	124786356	124786503	630	380	1007	133	0	0	NM_005505.4_dup1	NM_001082959.1_dup1
CD44	960	NC_000011.10	+	35211245	35211449	35189834	35190065	35214851	35214914	42	209	649	65	0	0	XM_005253238.2_dup1,XM_011520484.1_dup1,NM_001202555.1_dup1,BGI_novel_T012828,NM_000610.3_dup1,XM_017018583.1_dup1,XM_005253240.2_dup1,XM_005253239.2_dup1,NM_001001389.1_dup1,XM_005253232.2_dup1,XM_005253233.2_dup1,NM_001001390.1_dup1,XM_005253234.2_dup1,XM_005253235.2_dup1,XM_011520483.1_dup1,XM_006718388.1_dup1,XM_005253231.2_dup1,XM_011520485.1_dup1,XM_011520486.1_dup1,BGI_novel_T012831	BGI_novel_T012829,BGI_novel_T012830,XM_017018585.1_dup1,NM_001202557.1_dup1,XM_017018584.1_dup1,XM_011520488.1_dup1,XM_011520482.1_dup1,NM_001001391.1_dup1
	960	NC_000011.10	+	35204511	35204640	35189834	35190065	35214851	35214914	6	209	52	65	4.10927e-11	3.64878e-08	XM_005253238.2_dup1,XM_011520484.1_dup1,BGI_novel_T012828,BGI_novel_T012829,BGI_novel_T012830,NM_000610.3_dup1,XM_017018583.1_dup1,NM_001001389.1_dup1,XM_011520482.1_dup1,XM_005253232.2_dup1,XM_005253233.2_dup1,XM_005253234.2_dup1,XM_005253235.2_dup1,XM_011520483.1_dup1,XM_006718388.1_dup1,XM_005253231.2_dup1,XM_011520485.1_dup1,BGI_novel_T012831	NM_001202555.1_dup1,XM_017018585.1_dup1,NM_001202557.1_dup1,XM_017018584.1_dup1,XM_005253240.2_dup1,XM_011520488.1_dup1,XM_005253239.2_dup1,NM_001001390.1_dup1,NM_001001391.1_dup1,XM_011520486.1_dup1
	960	NC_000011.10	+	35209964	35210054	35189834	35190065	35211245	35211449	1	6	293	2	5.12704e-08	3.07601e-05	XM_005253238.2_dup1,XM_011520484.1_dup1,BGI_novel_T012828,NM_000610.3_dup1,XM_017018583.1_dup1,XM_005253240.2_dup1,XM_005253239.2_dup1,NM_001001389.1_dup1,XM_005253232.2_dup1,XM_005253233.2_dup1,NM_001001390.1_dup1,XM_005253234.2_dup1,XM_005253235.2_dup1,XM_011520483.1_dup1,XM_006718388.1_dup1,XM_005253231.2_dup1,XM_011520485.1_dup1,XM_011520486.1_dup1,BGI_novel_T012831	NM_001202555.1_dup1
	960	NC_000011.10	+	35208104	35208206	35189834	35190065	35211245	35211449	3	6	228	2	7.04982e-07	0.000326032	XM_005253238.2_dup1,XM_011520484.1_dup1,BGI_novel_T012828,NM_000610.3_dup1,XM_017018583.1_dup1,XM_005253240.2_dup1,XM_005253239.2_dup1,NM_001001389.1_dup1,XM_005253232.2_dup1,XM_005253233.2_dup1,NM_001001390.1_dup1,XM_005253234.2_dup1,XM_005253235.2_dup1,XM_011520483.1_dup1,XM_006718388.1_dup1,XM_005253231.2_dup1,XM_011520485.1_dup1,XM_011520486.1_dup1,BGI_novel_T012831	NM_001202555.1_dup1
CLK2	1196	NW_003315906.1	-	68595	68731	67848	68423	68972	69063	19	135	81	117	1.73901e-05	0.005939	BGI_novel_T024272	BGI_novel_T024273,BGI_novel_T024271
	1196	NW_003315906.1	-	73730	73815	73315	73382	74510	74736	67	20	52	0	0.000119189	0.0316865	BGI_novel_T024272,BGI_novel_T024270,XM_005244878.1_dup1,XM_017000244.1_dup1	XM_011509147.2_dup1,XM_011509143.1_dup1
COL16A1	1307	NC_000001.11	-	31679803	31679851	31679631	31679685	31680041	31680101	17	0	13	21	2.14857e-05	0.00687903	XM_011540722.1_dup1,XM_011540724.1_dup1,XM_017000340.1_dup1,XM_017000338.1_dup1,XM_011540729.1_dup1,BGI_novel_T000531,XM_017000339.1_dup1,XR_001736981.1_dup1,XM_011540727.2_dup1,NM_001856.3_dup1,BGI_novel_T000532,XM_011540728.2_dup1,XR_001736982.1_dup1,XR_946546.2_dup1,XM_017000341.1_dup1	XM_011540730.1_dup1,XR_001736984.1_dup1,BGI_novel_T000534,XM_011540723.1_dup1,XM_011540726.2_dup1,BGI_novel_T000533,XM_005270481.1_dup1
CSNK1D	1453	NC_000017.11	-	82245975	82246039	82242665	82244831	82248874	82249014	474	149	636	31	2.22045e-16	2.66436e-13	XR_430028.3_dup1,XR_933922.2_dup1,XR_243518.3_dup1,XR_933923.2_dup1	NA
CTNND1	1500	NC_000011.10	+	57791384	57791673	57761761	57762046	57794009	57794081	137	21	48	46	9.59594e-08	5.46194e-05	NM_001085460.1_dup1,NM_001085462.1_dup1	NM_001206884.1_dup1,NM_001206886.1_dup1,NM_001206883.1_dup1,NM_001085463.1_dup1,NM_001206887.1_dup1,NM_001085464.1_dup1,NM_001206889.1_dup1,NM_001085465.1_dup1,NM_001085466.1_dup1,NM_001206888.1_dup1,NM_001085468.1_dup1
	1500	NC_000011.10	+	57791493	57791673	57761761	57762046	57794009	57794081	73	21	20	46	1.59372e-07	8.73536e-05	NM_001206884.1_dup1,NM_001206886.1_dup1,NM_001206883.1_dup1,NM_001206887.1_dup1,NM_001206889.1_dup1,NM_001206888.1_dup1	NM_001085460.1_dup1,NM_001085463.1_dup1,NM_001085462.1_dup1,NM_001085464.1_dup1,NM_001085465.1_dup1,NM_001085466.1_dup1,NM_001085468.1_dup1
	1500	NC_000011.10	+	57791384	57791673	57761761	57762046	57795576	57795729	117	16	46	34	1.29363e-05	0.00452229	NM_001085460.1_dup1,NM_001085462.1_dup1	NM_001206884.1_dup1,NM_001206886.1_dup1,NM_001206883.1_dup1,NM_001085463.1_dup1,NM_001206887.1_dup1,NM_001085464.1_dup1,NM_001206889.1_dup1,NM_001085465.1_dup1,NM_001085469.1_dup1,NM_001085466.1_dup1,NM_001206888.1_dup1,NM_001085468.1_dup1
	1500	NC_000011.10	+	57791493	57791673	57761761	57762046	57795576	57795729	53	16	18	34	5.12447e-05	0.0144911	NM_001206884.1_dup1,NM_001206886.1_dup1,NM_001206883.1_dup1,NM_001206887.1_dup1,NM_001206889.1_dup1,NM_001206888.1_dup1	NM_001085460.1_dup1,NM_001085463.1_dup1,NM_001085462.1_dup1,NM_001085464.1_dup1,NM_001085465.1_dup1,NM_001085469.1_dup1,NM_001085466.1_dup1,NM_001085468.1_dup1
DNM1	1759	NC_000009.12	+	128247923	128247935	128247374	128247486	128248582	128248753	34	30	33	136	8.66787e-05	0.023609	XR_001746219.1_dup1,XM_017014369.1_dup1,BGI_novel_T011172,NM_004408.3_dup1,XR_001746220.1_dup1,XR_001746222.1_dup1,XR_001746221.1_dup1,XM_005251763.2_dup1,XM_017014371.1_dup1,XM_017014373.1_dup1,NM_001288739.1_dup1,NM_001288738.1_dup1,XM_006716992.2_dup1,XM_005251769.2_dup1,NM_001288737.1_dup1,XM_011518335.2_dup1,NM_001005336.2_dup1,XM_005251768.2_dup1,BGI_novel_T011171,XM_011518336.2_dup1	XM_017014370.1_dup1
DNM2	1785	NC_000019.10	+	10808568	10808580	10805915	10805967	10812263	10812377	6	131	25	70	1.92758e-05	0.00643449	BGI_novel_T020293,BGI_novel_T020290,NM_001005360.2_dup1,BGI_novel_T020291,NM_001190716.1_dup1,NM_001005361.2_dup1	NM_004945.3_dup1,NM_001005362.2_dup1,BGI_novel_T020294,BGI_novel_T020292
DNMT3B	1789	NC_000020.11	+	32806208	32806327	32802384	32802470	32807761	32809356	20	55	98	29	2.07812e-10	1.64754e-07	BGI_novel_T021618,NM_175848.1_dup1,NM_175850.2_dup1,NM_006892.3_dup1,BGI_novel_T021617	NM_001207056.1_dup1,XR_936511.2_dup1,NM_001207055.1_dup1,NM_175849.1_dup1,XM_011528653.2_dup1
DOCK3	1795	NC_000003.12	+	51277607	51277712	51275078	51275206	51280105	51280204	11	0	2	11	6.54523e-05	0.018049	XM_005264917.3_dup1	XM_005264914.3_dup1,BGI_novel_T004653,NM_004947.4_dup1,XM_017005825.1_dup1,XM_005264918.3_dup1,XM_005264916.3_dup1,XM_006713008.3_dup1,XM_011533441.2_dup1,XM_006713010.3_dup1,XM_017005827.1_dup1,XM_005264915.3_dup1,XM_006713009.3_dup1,XM_017005826.1_dup1
ECT2	1894	NC_000003.12	+	172755482	172755575	172755294	172755374	172756982	172757165	66	145	160	122	1.83722e-05	0.0062265	BGI_novel_T005348,XM_017005830.1_dup1,XM_006713523.3_dup1,XM_017005835.1_dup1,NM_001258315.1_dup1,XM_011512514.2_dup1,XM_006713524.3_dup1,BGI_novel_T005349,XM_017005831.1_dup1,XM_017005834.1_dup1,XM_017005836.1_dup1,XM_011512515.2_dup1,BGI_novel_T005346	BGI_novel_T005347,XM_011512516.1_dup1,XM_017005837.1_dup1,XM_017005832.1_dup1,XM_017005838.1_dup1,NM_018098.5_dup1,XM_017005833.1_dup1,NM_001258316.1_dup1,XM_005247176.1_dup1
EIF4G1	1981	NC_000003.12	+	184315762	184315856	184314494	184314674	184317320	184317497	60	28	69	1	1.29525e-06	0.00056458	NM_001194946.1_dup1,NM_001194947.1_dup1,NM_198241.2_dup1	NM_198244.2_dup1
CTTN	2017	NC_000011.10	+	70421469	70421580	70420399	70420510	70422939	70422995	336	91	633	55	5.91369e-07	0.000276369	XM_006718448.3_dup1,NM_005231.3_dup1,BGI_novel_T013307	NM_138565.2_dup1,NM_001184740.1_dup1
EPB41	2035	NC_000001.11	+	29096154	29096604	29064981	29065158	29097806	29097935	76	407	1148	198	0	0	XM_017000584.1_dup1,XM_011540961.1_dup1,XM_017000595.1_dup1,XM_011540964.1_dup1,XM_017000583.1_dup1,XM_005245753.1_dup1,BGI_novel_T000511,XM_017000593.1_dup1,XM_011540956.1_dup1,XM_017000581.1_dup1,XM_011540959.1_dup1,XM_017000582.1_dup1,XM_006710434.1_dup1,XM_017000585.1_dup1,XM_011540960.1_dup1,XM_017000597.1_dup1,XM_017000594.1_dup1,XM_011540962.1_dup1,BGI_novel_T000504,XM_005245757.1_dup1,XM_…	NM_001166007.1_dup1,XM_006710439.1_dup1,XM_005245761.1_dup1,BGI_novel_T000518,BGI_novel_T000509,XM_005245763.1_dup1,XM_005245764.1_dup1,BGI_novel_T000516,XM_011540958.1_dup1,XM_017000590.1_dup1,BGI_novel_T000515,BGI_novel_T000506,XM_005245760.1_dup1,BGI_novel_T000514,XM_005245769.1_dup1,BGI_novel_T000510,NM_203342.2_dup1,BGI_novel_T000519,XM_005245770.1_dup1,XM_017000586.1_dup1,NM_001166005.1_dup…
	2035	NC_000001.11	+	29060421	29060484	29053106	29053312	29064981	29065158	146	134	326	59	3.88578e-15	4.31293e-12	XM_017000587.1_dup1,XM_017000588.1_dup1,XM_017000593.1_dup1,BGI_novel_T000506,XM_017000582.1_dup1,BGI_novel_T000507,BGI_novel_T000504,XM_011540957.1_dup1,XM_017000601.1_dup1	XM_017000583.1_dup1,XM_017000590.1_dup1,BGI_novel_T000514,XM_005245770.1_dup1,XM_017000592.1_dup1,XM_017000604.1_dup1,XM_017000597.1_dup1,BGI_novel_T000512,XM_017000602.1_dup1
STX2	2054	NC_000012.12	-	130795994	130796120	130789599	130791977	130798524	130798635	253	34	158	67	4.66586e-05	0.0134513	XM_017018983.1_dup1,XM_017018978.1_dup1,NM_194356.2_dup1,XM_017018984.1_dup1	XM_017018985.1_dup1,XM_017018980.1_dup1,NM_001980.3_dup1
FGFR3	2261	NC_000004.12	+	1802913	1803064	1801834	1802025	1803691	1804520	43	82	105	5	0	0	BGI_novel_T005577	NA
FGFR2	2263	NC_000010.11	-	121518681	121518829	121517318	121517463	121519978	121520169	6	145	257	8	0	0	NR_073009.1_dup1	XM_017015924.1_dup1,XM_017015921.1_dup1,NM_001144918.1_dup1,BGI_novel_T012392,XM_017015923.1_dup1,NM_023029.2_dup1,XM_017015925.1_dup1,NM_000141.4_dup1,NM_001144915.1_dup1,NM_001144916.1_dup1,NM_001320658.1_dup1,NM_001320654.1_dup1
	2263	NC_000010.11	-	121517318	121517463	121515116	121515319	121518681	121518829	221	0	63	156	0	0	NR_073009.1_dup1	XM_006717711.2_dup1,NM_001144913.1_dup1,XM_006717710.3_dup1,NM_022970.3_dup1,XM_006717712.2_dup1,NM_001144919.1_dup1
FLNA	2316	NC_000023.11	-	154357250	154357274	154354824	154355072	154357433	154357623	758	1921	1461	1658	0	0	XM_011531127.1_dup1,XM_011531129.1_dup1,XM_011531131.1_dup1,NM_001110556.1_dup1	BGI_novel_T023514,XM_011531130.1_dup1,NM_001456.3_dup1,XM_011531128.1_dup1
FLNB	2317	NC_000003.12	+	58141857	58141929	58138281	58138529	58142649	58142752	0	141	104	96	0	0	NM_001457.3_dup1,NM_001164317.1_dup1,XR_001740065.1_dup1,BGI_novel_T004757,XR_940396.2_dup1	BGI_novel_T004758,NM_001164319.1_dup1,BGI_novel_T004759,XM_005264978.1_dup1,NM_001164318.1_dup1
	2317	NC_000003.12	+	58141857	58141896	58138281	58138529	58142649	58142752	0	141	70	96	0	0	BGI_novel_T004758,BGI_novel_T004759,NM_001164318.1_dup1	NM_001164319.1_dup1,XM_005264978.1_dup1,NM_001457.3_dup1,NM_001164317.1_dup1,XR_001740065.1_dup1,BGI_novel_T004757,XR_940396.2_dup1
FN1	2335	NC_000002.12	-	215392930	215393203	215391631	215391814	215394527	215394719	313	48	159	137	2.22045e-16	2.66436e-13	XM_005246407.1_dup1,XM_005246398.1_dup1,NM_212482.2_dup1,XM_017003693.1_dup1,XM_005246402.1_dup1,NM_001306129.1_dup1,XM_005246411.1_dup1,XM_005246397.1_dup1,XM_005246410.1_dup1,NM_001306130.1_dup1,XM_005246405.1_dup1,XM_005246408.1_dup1,XM_017003694.1_dup1,XM_005246401.1_dup1,XM_005246403.1_dup1,XM_017003692.1_dup1,XM_005246399.1_dup1	XM_005246406.1_dup1,XM_005246409.1_dup1,NM_001306131.1_dup1,XM_005246412.1_dup1,NM_212474.2_dup1,XM_005246404.1_dup1,XM_005246416.1_dup1,NM_212478.2_dup1,NM_001306132.1_dup1,NM_212476.2_dup1,NM_002026.3_dup1,XM_017003695.1_dup1,XM_005246414.1_dup1
GCNT2	2651	NW_018654713.1	+	39979	40720	39514	39725	132234	132327	0	16	123	0	0	0	XM_005248999.2_dup1	NA
HMOX2	3163	NT_187608.1	+	198468	198589	178662	178810	207806	207933	17	7	5	273	1.39945e-10	1.21827e-07	NM_001286267.1_dup1	NM_001286269.1_dup1,NM_002134.3_dup1,NM_001127204.1_dup1
	3163	NT_187608.1	+	185959	186077	178662	178810	207806	207933	19	7	14	273	1.58225e-10	1.3509e-07	NM_001127204.1_dup1	NM_001286269.1_dup1,NM_002134.3_dup1,NM_001286267.1_dup1
	3163	NT_187608.1	+	185959	186065	178726	178810	207806	207933	13	7	12	273	5.61779e-07	0.000268186	XM_017023196.1_dup1	NA
HNRNPA1	3178	NC_000012.12	+	54283078	54283234	54282572	54282665	54283811	54283967	1948	4	1391	186	0	0	NM_031157.3_dup1,XM_005268826.1_dup1,XR_245923.1_dup1	BGI_novel_T014508,NR_135167.1_dup1,XM_017019251.1_dup1,NM_002136.3_dup1
HNRNPL	3191	NW_014040929.1	-	251284	251354	250159	250231	253513	253586	20	902	17	26	2.40721e-06	0.000980486	XR_243927.2_dup1,BGI_novel_T024484	XM_011526886.1_dup1,XM_011526887.1_dup1,XM_011526888.2_dup1,NM_001533.2_dup1,NM_001005335.1_dup1,XM_011526889.1_dup1
ABCC1	4363	NC_000016.10	+	16138363	16138558	16136477	16136644	16141172	16143062	194	1	201	88	0	0	XM_011522498.2_dup1,XM_017023241.1_dup1,XM_017023239.1_dup1,XM_017023240.1_dup1,XM_017023237.1_dup1,XM_017023242.1_dup1,XM_011522497.1_dup1,XM_017023238.1_dup1	NA
	4363	NC_000016.10	+	16048141	16048303	16045835	16046013	16052723	16052816	493	1	1159	80	4.14395e-07	0.000204421	XM_011522498.2_dup1,BGI_novel_T017566,NM_004996.3_dup1,BGI_novel_T017565,BGI_novel_T017567,XM_017023241.1_dup1,XM_017023239.1_dup1,XM_017023240.1_dup1,BGI_novel_T017569,XM_017023243.1_dup1,BGI_novel_T017568,XM_017023237.1_dup1,XM_017023242.1_dup1,XM_011522497.1_dup1,XM_017023238.1_dup1	NA
MYO1B	4430	NC_000002.12	+	191400748	191400835	191400381	191400468	191408114	191408189	87	17	39	38	3.58423e-05	0.0106086	XM_017004158.1_dup1,NM_001161819.1_dup1,XM_017004157.1_dup1,XM_005246572.1_dup1,NM_001130158.1_dup1,BGI_novel_T003676	NM_012223.3_dup1,XM_017004156.1_dup1
	4430	NC_000002.12	+	191400748	191400835	191400381	191400468	191402631	191402718	159	5	58	18	5.75774e-05	0.0160771	XM_017004158.1_dup1,NM_001161819.1_dup1,XM_005246572.1_dup1,NM_001130158.1_dup1,BGI_novel_T003676	XM_017004156.1_dup1
MYL6	4637	NC_000012.12	+	56160625	56160670	56160242	56160320	56161386	56161582	1164	1230	1617	908	2.6612e-13	2.68522e-10	NM_021019.4_dup1	NM_079423.3_dup1
NAP1L4	4676	NC_000011.10	-	2989128	2989271	2979206	2979237	2992253	2992377	22	0	27	26	5.00101e-05	0.0142327	BGI_novel_T012612	BGI_novel_T012611,NM_005969.3_dup1
	4676	NC_000011.10	-	2979206	2979237	2978283	2978342	2992253	2992377	1	6	26	0	6.60181e-05	0.0180926	BGI_novel_T012612,BGI_novel_T012611,NM_005969.3_dup1	NA
NF2	4771	NC_000022.11	+	29683019	29683079	29681438	29681601	29694751	29698600	6	85	52	8	0	0	NM_181832.2_dup1,BGI_novel_T022470	NM_000268.3_dup1,NM_016418.5_dup1,NM_181830.2_dup1,NM_181828.2_dup1,NM_181829.2_dup1
	4771	NC_000022.11	+	29683019	29683064	29681438	29681601	29694751	29698600	12	85	111	8	0	0	NM_016418.5_dup1,NM_181830.2_dup1,NM_181828.2_dup1,NM_181829.2_dup1	NM_000268.3_dup1,NM_181832.2_dup1,BGI_novel_T022470
NFYA	4800	NC_000006.12	+	41080810	41080897	41079028	41079164	41084045	41084192	46	22	25	86	2.41414e-07	0.000124629	NM_002505.4_dup1	BGI_novel_T007734,NM_021705.3_dup1
	4800	NC_000006.12	+	41080813	41080897	41079028	41079164	41084045	41084192	38	22	27	86	2.2373e-05	0.00709495	BGI_novel_T007734	NM_002505.4_dup1,NM_021705.3_dup1
NUMA1	4926	NC_000011.10	-	72012400	72012442	72010785	72010854	72012894	72016260	31	380	90	332	5.24113e-05	0.0147272	XM_011545064.1_dup1,XM_011545057.2_dup1,XM_011545061.2_dup1,NM_006185.3_dup1,XM_011545055.1_dup1,XM_011545063.2_dup1,XM_011545062.2_dup1,XM_011545058.1_dup1,XM_006718564.1_dup1,XM_011545059.2_dup1,XM_011545056.2_dup1,XM_011545054.1_dup1,XM_011545060.2_dup1	XM_011545065.1_dup1,XM_017017830.1_dup1,BGI_novel_T013320,BGI_novel_T013319,XM_011545066.1_dup1,XM_017017831.1_dup1,NM_001286561.1_dup1
PBX1	5087	NC_000001.11	+	164820071	164820184	164811989	164812149	164821536	164821626	277	219	253	449	3.42322e-06	0.00133316	XM_005245228.3_dup1,BGI_novel_T001766,NM_002585.3_dup1,NM_001204963.1_dup1,XM_005245229.3_dup1,XM_011509590.1_dup1,BGI_novel_T001768,BGI_novel_T001764,XM_017001395.1_dup1	BGI_novel_T001762,BGI_novel_T001767,XM_011509591.2_dup1,XM_017001396.1_dup1,BGI_novel_T001763,NM_001204961.1_dup1,XM_011509592.1_dup1,BGI_novel_T001765
PSMB3	5691	NT_187614.1	+	2795826	2795927	2791201	2791309	2797729	2797824	118	112	38	4	7.74348e-06	0.00279502	NR_104195.1_dup1	NM_002795.3_dup1,NR_104194.1_dup1
PCYT2	5833	NC_000017.11	-	81907203	81907257	81906759	81906898	81907553	81907598	3	98	35	69	7.39733e-07	0.000338577	NM_001256434.2_dup1,XM_006722287.3_dup1,XM_005256386.3_dup1,XM_005256387.3_dup1,NM_001184917.2_dup1	NM_001256433.2_dup1,XM_017024911.1_dup1,NM_001256435.2_dup1,NM_001282204.1_dup1,NM_002861.4_dup1,XM_017024912.1_dup1,XM_017024910.1_dup1,NM_001282203.1_dup1
RAC1	5879	NC_000007.14	+	6398661	6398718	6391923	6392041	6400125	6400188	4	568	76	503	5.85852e-06	0.00214959	NM_018890.3_dup1	NM_006908.4_dup1
RPS24	6229	NC_000010.11	+	78040200	78040225	78037193	78037304	78040614	78040716	306	411	148	663	0	0	NM_001142283.1_dup1	NM_001142282.1_dup1,NM_033022.3_dup1,NM_001026.4_dup1,NM_001142284.1_dup1
	6229	NC_000010.11	+	78040201	78040225	78037193	78037304	78040614	78040716	305	411	147	663	0	0	NM_001142282.1_dup1	NM_033022.3_dup1,NM_001026.4_dup1,NM_001142284.1_dup1,NM_001142283.1_dup1
	6229	NC_000010.11	+	78040203	78040225	78037193	78037304	78040614	78040716	2154	411	1282	663	7.70507e-10	5.6079e-07	NM_033022.3_dup1,NM_001142284.1_dup1	NM_001142282.1_dup1,NM_001026.4_dup1,NM_001142283.1_dup1
TRA2B	6434	NC_000003.12	-	185931576	185931852	185926600	185926734	185937824	185938028	2812	777	1926	936	3.31916e-10	2.49764e-07	XM_005247703.1_dup1	NA
SPTAN1	6709	NC_000009.12	+	128592982	128593042	128591476	128591625	128594174	128594373	34	169	218	70	0	0	XM_006717248.2_dup1,XM_006717245.1_dup1,XM_017015059.1_dup1,XM_006717254.2_dup1,NM_001130438.2_dup1,NM_003127.3_dup1,XM_006717249.1_dup1,BGI_novel_T011184,XM_006717250.1_dup1,XM_006717246.1_dup1	XM_006717252.2_dup1,XM_006717253.1_dup1,XM_017015061.1_dup1,XM_017015060.1_dup1,NM_001195532.1_dup1,XM_006717247.2_dup1,BGI_novel_T011185,XM_006717251.2_dup1
CDKL5	6792	NC_000023.11	+	18623878	18624001	18619866	18619966	18625127	18625247	2	22	27	15	4.6136e-05	0.0134513	BGI_novel_T022902	BGI_novel_T022903,NM_003159.2_dup1,NM_001037343.1_dup1,BGI_novel_T022901,NM_001323289.1_dup1
TCEA1	6917	NC_000008.11	-	54002891	54002940	53999944	54000050	54010429	54010492	6	0	5	246	3.3989e-07	0.000171479	XM_006716467.1_dup1	NM_006756.3_dup1,NR_109901.1_dup1,XM_011517578.1_dup1
	6917	NC_000008.11	-	54002891	54003092	53999944	54000050	54010429	54010492	9	0	5	246	5.16153e-06	0.00190964	NR_109901.1_dup1	NM_006756.3_dup1,XM_006716467.1_dup1,XM_011517578.1_dup1
TSC2	7249	NC_000016.10	+	2077597	2077726	2076490	2076585	2079031	2079196	8	69	56	48	1.45655e-07	8.08329e-05	NM_001114382.2_dup1,XM_011522636.2_dup1,XM_017023618.1_dup1,XM_011522638.2_dup1,NM_000548.4_dup1	NM_001318829.1_dup1,XM_005255531.4_dup1,XM_017023617.1_dup1,XM_011522639.2_dup1,XM_005255529.4_dup1,NM_001318827.1_dup1
TUFT1	7286	NC_000001.11	+	151562090	151562165	151540304	151540426	151562584	151562686	11	52	71	43	2.28173e-07	0.000119179	NM_020127.2_dup1	NM_001126337.1_dup1
VEGFA	7422	NC_000006.12	+	43780731	43780803	43778888	43778918	43781955	43782087	59	205	107	108	2.0201e-05	0.00664344	NM_003376.5_dup1,NM_001171624.1_dup1	NM_001025367.2_dup1,NM_001317010.1_dup1,NM_001025366.2_dup1,NM_001025368.2_dup1,NM_001171623.1_dup1,NM_001033756.2_dup1,NM_001171625.1_dup1,NM_001171626.1_dup1,BGI_novel_T007821,NM_001171629.1_dup1,NM_001287044.1_dup1
PICALM	8301	NC_000011.10	-	85978069	85978093	85976622	85976682	85981128	85981228	12	153	33	83	4.72618e-05	0.0135373	NM_001008660.2_dup1,XM_017018388.1_dup1,XM_005274332.2_dup1,XM_005274330.2_dup1,XM_017018381.1_dup1,XM_011545293.1_dup1,XM_005274322.2_dup1,XM_005274336.2_dup1,XM_005274328.2_dup1,XM_006718699.2_dup1,XM_006718700.2_dup1,XM_005274326.2_dup1,XM_005274323.2_dup1	NM_001206946.1_dup1,XM_006718701.3_dup1,XM_005274324.2_dup1,XM_005274325.2_dup1,XM_005274335.2_dup1,XM_005274329.3_dup1,XM_005274333.2_dup1,NM_007166.3_dup1,XM_017018384.1_dup1,XM_017018383.1_dup1,NM_001206947.1_dup1
USO1	8615	NC_000004.12	+	75795335	75795356	75793689	75793901	75799621	75799732	0	181	52	91	0	0	XM_006714396.3_dup1,NM_001290049.1_dup1	NM_003715.3_dup1,XM_006714397.3_dup1
ADAM15	8751	NC_000001.11	+	155061903	155061975	155060762	155060832	155062244	155062369	39	350	217	284	0	0	NM_207196.2_dup1,NM_207195.2_dup1,NM_207197.2_dup1	NR_048578.1_dup1,NR_048577.1_dup1,NM_001261464.1_dup1,NM_003815.4_dup1,NR_048579.1_dup1,NM_207194.2_dup1
	8751	NC_000001.11	+	155061903	155062117	155061414	155061489	155062244	155062369	457	29	239	60	7.47996e-07	0.000338865	NR_048578.1_dup1	NM_207194.2_dup1,NM_207197.2_dup1
SLC25A14	9016	NC_000023.11	+	130349823	130349867	130349250	130349345	130350645	130350731	2	36	23	23	2.50384e-05	0.00782839	BGI_novel_T023338,XM_017029941.1_dup1	XM_011531402.2_dup1,XM_017029937.1_dup1,XM_011531403.1_dup1,XM_017029936.1_dup1,BGI_novel_T023340,XM_017029942.1_dup1,XM_017029938.1_dup1,XM_017029939.1_dup1,BGI_novel_T023339,NM_001282198.1_dup1,XM_017029940.1_dup1,NM_001282195.1_dup1,NM_001282196.1_dup1,XM_005262489.4_dup1,NM_001282197.1_dup1
MPZL1	9019	NC_000001.11	+	167776063	167776166	167773235	167773368	167787819	167791919	549	94	655	17	2.36885e-10	1.84509e-07	NM_003953.5_dup1	NM_024569.4_dup1
PRC1	9055	NC_000015.10	-	90969078	90969120	90966037	90967202	90969446	90969623	182	109	82	184	1.88596e-10	1.55057e-07	XM_017022715.1_dup1,NM_003981.3_dup1,XM_017022712.1_dup1	XM_017022716.1_dup1,XM_017022713.1_dup1,NM_199413.2_dup1
	9055	NC_000015.10	-	90969078	90969120	90966037	90967202	90969523	90969623	101	85	45	146	1.9102e-07	0.000102178	XM_006720759.1_dup1	NM_001267580.1_dup1
MAGI1	9223	NC_000003.12	-	65448021	65448057	65442791	65442849	65453257	65453340	7	0	3	18	0.00017005	0.0436399	XM_017007498.1_dup1,XM_017007502.1_dup1,XM_005265574.3_dup1,XM_005265571.1_dup1,XM_017007497.1_dup1,XM_017007505.1_dup1,XM_017007507.1_dup1,XM_005265564.1_dup1,XM_017007500.1_dup1,BGI_novel_T004820,XM_005265566.1_dup1,NM_001033057.1_dup1,BGI_novel_T004817,NM_004742.2_dup1,XM_017007506.1_dup1,XM_006713412.1_dup1,XM_006713409.1_dup1,NM_015520.1_dup1,XM_017007508.1_dup1,XM_017007501.1_dup1,BGI_novel…	BGI_novel_T004815,BGI_novel_T004814,XM_017007504.1_dup1,XM_005265563.1_dup1,XM_011534236.1_dup1,BGI_novel_T004816,XM_006713407.1_dup1,XM_006713414.3_dup1,XM_005265568.1_dup1,XM_006713410.1_dup1,BGI_novel_T004819,XM_005265570.1_dup1,XM_006713411.1_dup1,XM_017007499.1_dup1,XM_017007503.1_dup1,XM_005265565.1_dup1,XM_006713408.1_dup1,BGI_novel_T004813
SLK	9748	NC_000010.11	+	104010815	104010908	104008176	104008356	104018159	104018289	0	83	83	42	0	0	NM_014720.3_dup1,XM_011540401.2_dup1	BGI_novel_T012332,NM_001304743.1_dup1
ARHGEF11	9826	NC_000001.11	-	156938417	156938513	156937248	156937496	156939547	156939910	146	19	16	107	0	0	NM_014784.3_dup1,XM_011510187.2_dup1,XM_011510186.2_dup1,XM_006711661.2_dup1,XM_017002922.1_dup1,XM_006711659.2_dup1,XM_017002924.1_dup1,NM_198236.2_dup1,XM_011510185.2_dup1,XM_017002923.1_dup1,XM_006711665.3_dup1,XM_006711662.2_dup1,XM_005245633.4_dup1,XM_017002921.1_dup1,XM_006711660.3_dup1,XM_017002920.1_dup1,XM_006711663.3_dup1,XM_011510189.2_dup1,XM_005245629.4_dup1	BGI_novel_T001710,BGI_novel_T001709
SCAMP3	10067	NW_003315906.1	-	66679	66757	65559	65682	67108	67726	146	14	126	94	1.6257e-11	1.47298e-08	XM_006711105.3_dup1,XM_016999991.1_dup1	NA
AKAP9	10142	NC_000007.14	+	92042045	92042186	92040673	92040898	92042667	92042771	74	10	33	45	1.50854e-08	9.70646e-06	NM_005751.4_dup1,BGI_novel_T009078,XM_017011653.1_dup1,XM_017011643.1_dup1,XM_017011656.1_dup1,XM_017011645.1_dup1,XM_017011652.1_dup1,XM_017011642.1_dup1,XM_017011649.1_dup1,XM_017011648.1_dup1,XM_017011657.1_dup1,XM_017011646.1_dup1,XM_017011647.1_dup1,XM_017011655.1_dup1,NM_147185.2_dup1,BGI_novel_T009079,XM_017011650.1_dup1,BGI_novel_T009076,XM_017011644.1_dup1	BGI_novel_T009077,XM_017011651.1_dup1,BGI_novel_T009075,XM_017011654.1_dup1
SUGP2	10147	NC_000019.10	-	18993637	18993740	18990893	18991149	18994365	18995280	404	69	526	23	2.44883e-05	0.0077107	NA	NA
	10147	NC_000019.10	-	18993647	18993740	18990887	18991149	18994365	18994486	350	69	441	23	2.875e-05	0.00880287	XR_430124.3_dup1,XR_001753576.1_dup1,XR_001753580.1_dup1	XR_936144.2_dup1,XR_430122.3_dup1,XR_936143.2_dup1
HNRNPR	10236	NW_014040926.1	-	103496	103610	93534	93711	107732	107840	81	119	128	12	0	0	NM_005826.4_dup1,NM_001102397.2_dup1,NM_001102398.2_dup1,XM_005245711.4_dup1,XM_011540471.2_dup1,BGI_novel_T024447,NM_001102399.2_dup1	XM_011540474.2_dup1,XM_011540476.2_dup1,NM_001297622.1_dup1,XM_017000008.1_dup1,NM_001297620.1_dup1,XM_011540475.2_dup1
	10236	NW_014040926.1	-	110830	110996	108468	108587	114189	114629	32	382	766	489	0	0	XM_011540475.2_dup1	XM_011540474.2_dup1,XM_011540476.2_dup1,XM_017000008.1_dup1,XM_011540477.2_dup1,BGI_novel_T024447
	10236	NW_014040926.1	-	110830	110999	108468	108587	114189	114262	35	382	742	489	0	0	XM_017000009.1_dup1,XM_005245711.4_dup1,XM_011540471.2_dup1	NA
ZNF267	10308	NC_000016.10	+	31890206	31890250	31885160	31885256	31914475	31917308	7	42	34	31	0.000176676	0.0448221	NR_049749.1_dup1	NM_003414.5_dup1,NM_001265588.1_dup1
BAIAP2	10458	NC_000017.11	+	81110913	81110959	81108474	81108509	81115769	81116225	2	64	78	50	5.66214e-15	6.13127e-12	XM_006721636.1_dup1,XM_005256945.1_dup1	XM_011524197.1_dup1,XM_017024017.1_dup1,XM_006721637.2_dup1,XM_005256943.1_dup1,XM_017024019.1_dup1,XM_017024018.1_dup1,XM_011524194.1_dup1,XM_011524196.1_dup1,XM_011524195.1_dup1
CARM1	10498	NC_000019.10	+	10921374	10921443	10921049	10921127	10921614	10923078	509	276	221	344	4.57412e-14	4.83517e-11	BGI_novel_T020295,XM_011527638.2_dup1	BGI_novel_T020296,XM_005259708.4_dup1
DEAF1	10522	NC_000011.10	-	646326	646555	644224	644654	653961	654051	1	36	23	19	1.94587e-05	0.00644707	XR_001747725.1_dup1	XR_428838.2_dup1,XR_930843.2_dup1
STAG2	10735	NC_000023.11	+	124021366	124021431	123962005	123962106	124022530	124022671	30	29	35	1	2.83013e-06	0.00112187	BGI_novel_T023322	NA
FNBP1	23048	NC_000009.12	-	129915965	129915980	129908889	129908999	129923843	129923939	1	61	18	30	2.56929e-06	0.00103699	XM_017014491.1_dup1,XM_017014487.1_dup1,XM_017014489.1_dup1,XM_005251829.2_dup1,XM_017014490.1_dup1,XM_006717016.2_dup1	XM_005251830.2_dup1
GSE1	23199	NC_000016.10	+	85633913	85634132	85555576	85556363	85648551	85648751	651	25	391	52	0.000140853	0.0365699	XM_005255864.4_dup1	XM_005255865.4_dup1
EXOC7	23265	NC_000017.11	-	76090328	76090481	76089174	76089320	76091142	76091235	12	24	26	5	0.000174254	0.0444619	NM_001145297.3_dup1	XM_006721787.3_dup1,NM_001282313.1_dup1,XM_006721786.3_dup1,XM_011524571.2_dup1,NM_001013839.3_dup1,BGI_novel_T019445,XR_001752458.1_dup1,NM_001145299.3_dup1
SUN1	23353	NC_000007.14	+	848417	848615	843340	843520	851383	851482	306	52	506	9	6.57193e-10	4.8629e-07	BGI_novel_T008442,BGI_novel_T008440,BGI_novel_T008441	BGI_novel_T008443,NM_001130965.2_dup1,BGI_novel_T008439
	23353	NC_000007.14	+	849519	850033	843340	843520	851383	851482	486	52	572	9	1.21168e-07	6.8095e-05	BGI_novel_T008441	BGI_novel_T008443,BGI_novel_T008442,BGI_novel_T008440,NM_001130965.2_dup1,BGI_novel_T008439
	23353	NC_000007.14	+	849922	850033	843340	843520	851383	851482	117	52	144	9	2.57058e-07	0.000131179	BGI_novel_T008440	BGI_novel_T008443,BGI_novel_T008442,BGI_novel_T008441,NM_001130965.2_dup1,BGI_novel_T008439
	23353	NC_000007.14	+	849519	849603	843340	843520	851383	851482	20	52	36	9	5.83427e-07	0.000275558	BGI_novel_T008442,BGI_novel_T008440	BGI_novel_T008443,BGI_novel_T008441,NM_001130965.2_dup1,BGI_novel_T008439
OSBPL3	26031	NC_000007.14	-	24863199	24863292	24861612	24861769	24863495	24863599	104	6	46	60	2.9976e-15	3.41242e-12	XM_017011948.1_dup1,XR_428073.3_dup1,XR_001744620.1_dup1,NM_015550.3_dup1,XM_006715684.3_dup1,XR_926927.2_dup1,NR_104111.1_dup1,XM_011515259.2_dup1,XM_005249698.3_dup1,XM_006715682.3_dup1,BGI_novel_T008607,XM_017011949.1_dup1,XM_011515258.2_dup1,NM_145321.2_dup1,BGI_novel_T008606,XR_428074.3_dup1	XR_428075.3_dup1,XM_006715683.3_dup1,XR_926929.1_dup1,NM_145320.2_dup1,XM_006715681.3_dup1,NM_145322.2_dup1,NR_104112.1_dup1
WSB1	26118	NC_000017.11	+	27307743	27307919	27306781	27306882	27309099	27309272	668	106	330	120	3.27565e-05	0.00976033	BGI_novel_T018781,XR_001752470.1_dup1	XM_005257963.3_dup1,NM_015626.8_dup1,XM_017024434.1_dup1,XM_017024433.1_dup1,NM_134265.2_dup1,BGI_novel_T018783
ARFIP1	27236	NC_000004.12	+	152870752	152870848	152863605	152863714	152872451	152872564	64	50	156	28	3.84628e-06	0.0014849	XM_011531868.2_dup1,NM_001287431.1_dup1,XM_011531869.2_dup1,XR_001741205.1_dup1,NM_001287432.1_dup1,NM_001025595.2_dup1,XM_011531870.2_dup1,XM_011531872.1_dup1	NM_014447.3_dup1,NM_001287433.1_dup1,NM_001025593.2_dup1,XM_011531871.2_dup1
	27333	NC_000003.12	-	168040785	168040869	168036835	168036994	168041391	168041474	594	17	640	100	5.70641e-08	3.37797e-05	XM_005247364.2_dup1,BGI_novel_T005318,NM_014498.4_dup1	XM_005247365.2_dup1,XM_017006183.1_dup1,NM_001308155.1_dup1,BGI_novel_T005317
	27335	NW_014040929.1	+	42065	42132	35663	35738	44628	44754	23	17	200	0	3.15836e-12	2.98344e-09	NM_001308393.1_dup1,NM_013234.3_dup1,BGI_novel_T024462,NM_001300992.1_dup1	NA
TMEM14C	51522	NW_018654713.1	+	236790	236892	233798	234125	239523	239611	6	13	89	11	3.29936e-06	0.0012963	NM_016462.3_dup1,NM_001165258.1_dup1	NA
VPS29	51699	NC_000012.12	-	110499534	110499546	110496011	110496203	110502048	110502106	71	201	17	290	1.11785e-09	8.00471e-07	XM_006719460.3_dup1	XM_011538484.2_dup1
STAG3L1	54441	NC_000007.14	+	75365951	75366059	75365563	75365643	75366323	75377593	119	0	8	7	8.30434e-07	0.000372412	BGI_novel_T008991	BGI_novel_T008990
ARHGAP17	55114	NC_000016.10	-	24939363	24939597	24935469	24935639	24941986	24942143	531	18	374	65	6.58309e-08	3.84565e-05	XR_950810.2_dup1,XM_011545874.2_dup1,XM_011545875.2_dup1,XR_950809.2_dup1,XM_011545877.2_dup1,XM_011545876.2_dup1,XM_011545873.2_dup1,NM_001006634.2_dup1	NM_018054.5_dup1,BGI_novel_T017708,BGI_novel_T017709,BGI_novel_T017710,XR_950811.2_dup1,XM_017023390.1_dup1,XM_011545878.2_dup1,BGI_novel_T017711
ARHGEF10L	55160	NC_000001.11	+	17634547	17634562	17632320	17632466	17634834	17635016	0	63	16	22	7.06574e-08	4.074e-05	XM_006710731.1_dup1,XR_946688.2_dup1,BGI_novel_T000370,XR_001737276.1_dup1,XM_005245923.2_dup1,XM_006710729.1_dup1,NM_018125.3_dup1,NM_001011722.2_dup1,XR_946690.2_dup1,XM_011541695.2_dup1,XR_946686.2_dup1,XM_017001621.1_dup1,XM_005245925.2_dup1,XM_011541691.2_dup1,XM_017001619.1_dup1,XM_005245927.2_dup1,XR_946689.2_dup1,XR_001737277.1_dup1,XM_017001618.1_dup1,XR_946691.2_dup1,BGI_novel_T000369,X…	XM_005245929.2_dup1,NM_001319838.1_dup1,XM_017001622.1_dup1,XM_011541692.2_dup1,NM_001319837.1_dup1,BGI_novel_T000368,XM_017001620.1_dup1,XM_011541696.2_dup1,BGI_novel_T000371,XM_017001617.1_dup1,XM_011541693.2_dup1
TMEM63B	55362	NC_000006.12	+	44135327	44135366	44135016	44135096	44136348	44136439	50	31	90	3	5.15512e-07	0.000251508	XM_006715135.1_dup1,XM_017010999.1_dup1,XM_005249211.3_dup1,NM_001318792.1_dup1,XM_005249213.4_dup1,BGI_novel_T007828,XR_001743506.1_dup1,NM_018426.2_dup1,XM_017011000.1_dup1,XM_005249217.1_dup1	XM_005249214.4_dup1,XM_017011001.1_dup1,BGI_novel_T007829,XM_017011002.1_dup1,XM_005249215.4_dup1
SMPD4	55627	NC_000002.12	-	130161185	130161272	130157250	130157396	130164373	130164445	11	70	85	44	9.59999e-12	8.87939e-09	NR_033230.2_dup1,XM_011511445.2_dup1,NR_033231.2_dup1,XM_017004448.1_dup1,NM_017951.4_dup1,XM_011511443.2_dup1	XM_017004449.1_dup1,NR_033232.2_dup1,NM_001171083.2_dup1,NM_017751.4_dup1,XM_011511444.2_dup1
	55627	NC_000002.12	-	130159512	130161272	130157250	130157396	130164373	130164445	190	70	494	44	3.6046e-07	0.000179813	XM_017004449.1_dup1	NR_033232.2_dup1,NR_033230.2_dup1,XM_011511445.2_dup1,NR_033231.2_dup1,NM_001171083.2_dup1,XM_017004448.1_dup1,NM_017951.4_dup1,NM_017751.4_dup1,XM_011511443.2_dup1,XM_011511444.2_dup1
ARHGEF40	55701	NC_000014.9	+	21087319	21087463	21087000	21087105	21087967	21088098	464	89	731	14	1.66533e-15	1.94568e-12	NM_018071.4_dup1,NM_001278529.1_dup1	BGI_novel_T015583,XM_017021437.1_dup1,BGI_novel_T015584,XM_005267844.2_dup1,NM_001278530.1_dup1
ENAH	55740	NC_000001.11	-	225504990	225505053	225500991	225501070	225507950	225508017	15	435	515	163	0	0	XM_017001746.1_dup1,XM_017001750.1_dup1,XM_017001755.1_dup1,XM_005273187.2_dup1,XM_017001757.1_dup1,XM_017001748.1_dup1,NM_001008493.1_dup1,XM_017001756.1_dup1,XM_017001753.1_dup1,XM_011544229.2_dup1,XM_017001754.1_dup1	XM_017001752.1_dup1,XM_017001751.1_dup1,XM_017001747.1_dup1,NM_018212.4_dup1,XM_017001749.1_dup1
SULF2	55959	NC_000020.11	-	47659398	47659452	47657251	47658392	47659696	47659730	347	1	165	88	0	0	BGI_novel_T021851,BGI_novel_T021850	NA
BCAP29	55973	NC_000007.14	+	107613653	107613732	107613331	107613432	107621629	107623317	7	0	0	28	1.37932e-06	0.00059454	BGI_novel_T009285,XM_011516407.1_dup1	XM_017012436.1_dup1,BGI_novel_T009287
GPCPD1	56261	NC_000020.11	-	5609639	5609811	5604363	5604440	5610841	5611005	1	44	25	28	3.10746e-05	0.00932347	XM_005260758.4_dup1	NA
ACTR3B	57180	NC_000007.14	+	152811696	152811733	152801620	152801731	152814549	152814645	29	531	84	397	1.03736e-05	0.00371416	XM_017012463.1_dup1,BGI_novel_T009616,XM_017012465.1_dup1,XM_017012462.1_dup1	XM_017012460.1_dup1,XM_006716065.2_dup1,NR_073000.1_dup1,XR_927492.1_dup1,NM_001040135.2_dup1,NR_073001.1_dup1,XM_017012464.1_dup1,XM_006716066.1_dup1,NM_020445.5_dup1,XM_011516426.2_dup1,XM_011516425.2_dup1,XM_006716067.3_dup1,XM_011516427.1_dup1,XM_017012461.1_dup1
PLEKHA1	59338	NC_000010.11	+	122428275	122428316	122426941	122427031	122429623	122432351	84	9	30	30	2.00538e-06	0.000830341	XM_017016487.1_dup1,XM_017016488.1_dup1,XM_005270020.1_dup1,XM_017016479.1_dup1,XM_017016486.1_dup1	XM_005270019.1_dup1,XM_011540024.1_dup1,XM_017016483.1_dup1,XM_011540021.1_dup1,XM_017016490.1_dup1,XM_005270016.1_dup1,XM_017016480.1_dup1,XM_011540019.1_dup1,XM_017016478.1_dup1,XM_011540018.1_dup1,XM_005270021.4_dup1,XM_011540017.1_dup1,XM_017016484.1_dup1,XM_017016481.1_dup1,XM_017016489.1_dup1,XM_011540022.1_dup1,XM_017016485.1_dup1,XM_017016482.1_dup1,XM_017016491.1_dup1
	59338	NC_000010.11	+	122428275	122428346	122426941	122427031	122429623	122432351	64	9	25	30	4.18584e-06	0.00160206	XM_005270019.1_dup1,XM_011540024.1_dup1,XM_017016483.1_dup1,XM_011540021.1_dup1,XM_011540019.1_dup1,XM_017016478.1_dup1,XM_011540018.1_dup1,XM_011540017.1_dup1,XM_017016484.1_dup1,XM_011540022.1_dup1,XM_017016485.1_dup1	XM_017016487.1_dup1,XM_017016488.1_dup1,XM_005270020.1_dup1,XM_017016490.1_dup1,XM_005270016.1_dup1,XM_017016480.1_dup1,XM_017016479.1_dup1,XM_005270021.4_dup1,XM_017016486.1_dup1,XM_017016481.1_dup1,XM_017016489.1_dup1,XM_017016482.1_dup1,XM_017016491.1_dup1
	59338	NC_000010.11	+	122428275	122428420	122426941	122427031	122429623	122432355	91	9	44	30	1.29243e-05	0.00452229	NM_001195608.1_dup1,BGI_novel_T012407,BGI_novel_T012404	BGI_novel_T012406,NM_001001974.2_dup1,NM_021622.4_dup1
KIF13A	63971	NC_000006.12	-	17771113	17771218	17764154	17764946	17771907	17772059	32	64	112	44	2.07234e-07	0.00010953	BGI_novel_T007494,BGI_novel_T007495,XM_017011188.1_dup1,BGI_novel_T007493	XM_017011192.1_dup1,NM_001105568.2_dup1
CENPK	64105	NC_000005.10	-	65557298	65557377	65554796	65554898	65561462	65561564	5	36	28	15	6.45164e-06	0.00234781	XM_017009694.1_dup1	XM_017009699.1_dup1,XM_011543537.2_dup1
INF2	64423	NC_000014.9	+	104715283	104715340	104714202	104714856	104718794	104719610	7	82	122	11	0	0	NM_022489.3_dup1	NM_001031714.3_dup1
UPF3B	65109	NC_000023.11	-	119840645	119840684	119838366	119838527	119841075	119841258	107	486	208	222	0	0	BGI_novel_T023308,XM_017029737.1_dup1,NM_080632.2_dup1,XM_017029738.1_dup1,XM_017029740.1_dup1	NM_023010.3_dup1,XM_017029739.1_dup1
79033	79033	NC_000001.11	-	44339044	44339322	44319627	44319744	44355259	44355294	907	0	841	20	6.0483e-05	0.0167829	BGI_novel_T000720	NA
LAS1L	81887	NC_000023.11	-	65524563	65524614	65524055	65524262	65524964	65525050	448	77	193	354	0	0	XM_011531046.1_dup1,XM_017029879.1_dup1,XM_005262304.1_dup1,XM_005262301.1_dup1,XM_005262305.3_dup1,XM_005262306.3_dup1,NM_031206.4_dup1,BGI_novel_T023131,XR_001755731.1_dup1,BGI_novel_T023135,BGI_novel_T023133,XR_938412.1_dup1,XR_244504.1_dup1,XR_001755732.1_dup1,XR_430522.1_dup1,XM_011531045.1_dup1	BGI_novel_T023130,XM_017029880.1_dup1,BGI_novel_T023132,XR_001755733.1_dup1,NM_001170649.1_dup1,XM_017029878.1_dup1,BGI_novel_T023134,XM_017029877.1_dup1,XR_001755730.1_dup1,NM_001170650.1_dup1
ARMC10	83787	NC_000007.14	+	103092476	103092653	103086629	103086764	103097276	103097348	264	12	195	43	2.15371e-05	0.00687903	NM_031905.4_dup1,XM_017012687.1_dup1,NM_001161009.2_dup1,XM_011516602.2_dup1,XM_017012684.1_dup1,XM_011516601.2_dup1	NM_001161010.2_dup1,XM_017012686.1_dup1,NM_001161012.2_dup1
DOT1L	84444	NC_000019.10	+	2227736	2228382	2226182	2227127	2229784	2232578	770	173	500	224	0.000166641	0.0430137	BGI_novel_T020053,XM_005259660.3_dup1	NM_032482.2_dup1,BGI_novel_T020054
MGME1	92667	NC_000020.11	+	17972706	17972751	17969800	17970370	17975683	17975903	2	108	46	143	2.01989e-06	0.000830341	BGI_novel_T021501,NM_001310338.1_dup1,BGI_novel_T021499,XM_005260867.2_dup1,BGI_novel_T021500,XM_006723663.3_dup1,XM_011529394.1_dup1	XM_017028127.1_dup1,BGI_novel_T021496,XM_017028128.1_dup1,XM_005260870.3_dup1,BGI_novel_T021497,BGI_novel_T021495,NM_052865.3_dup1
FMNL2	114793	NC_000002.12	+	152645433	152645527	152640790	152640914	152647795	152649826	277	10	183	44	1.61314e-06	0.00068864	XM_011510531.1_dup1,XM_005246263.2_dup1	XM_011510530.1_dup1,XM_011510534.1_dup1
LENG8	114823	NW_003571054.1	+	360059	360170	359164	359266	360943	361196	29	1	12	20	1.7316e-06	0.000725264	XM_011526413.2_dup1,XM_005278250.4_dup1,NM_052925.3_dup1,XM_011526415.2_dup1,BGI_novel_T024335,XM_005278249.4_dup1,BGI_novel_T024336,XM_006722996.3_dup1,BGI_novel_T024341,XM_005278248.4_dup1,BGI_novel_T024339	XM_006722997.3_dup1,BGI_novel_T024340,BGI_novel_T024338,BGI_novel_T024337,XM_005278252.4_dup1,XM_011526414.2_dup1
FOPNL	123811	NC_000016.10	-	15884007	15884205	15879803	15879888	15888557	15888649	799	127	765	3	0	0	NM_001304498.1_dup1,NM_144600.3_dup1,NM_001304502.1_dup1,NR_130756.1_dup1,NM_001304499.1_dup1	NM_001304500.1_dup1
	123811	NC_000016.10	-	15873490	15873627	15865718	15867516	15879803	15879888	532	169	470	3	0	0	NM_001304500.1_dup1,NM_144600.3_dup1,NR_130756.1_dup1,NM_001304499.1_dup1	NM_001304498.1_dup1,NM_001304502.1_dup1
LRRC75A-AS1	125144	NC_000017.11	+	16439527	16439703	16439326	16439414	16440184	16440253	1692	1620	1981	1095	1.17712e-08	7.68536e-06	NR_027163.1_dup1,NR_027169.1_dup1,NR_045026.1_dup1	NR_027175.1_dup1,NR_027173.1_dup1,NR_027167.1_dup1,NR_027170.1_dup1,NR_027168.2_dup1,NR_027166.1_dup1,NR_027179.1_dup1,NR_027165.1_dup1,NR_027164.1_dup1,NR_027158.1_dup1,NR_027172.2_dup1,NR_045023.1_dup1,NR_027174.1_dup1,NR_027178.1_dup1,NR_027177.1_dup1,NR_027176.1_dup1
	125144	NC_000017.11	+	16439580	16439703	16439326	16439414	16440184	16440253	1453	1620	1605	1095	4.44463e-06	0.00167227	NR_027167.1_dup1,NR_027168.2_dup1,NR_027164.1_dup1	NR_027175.1_dup1,NR_027173.1_dup1,NR_027163.1_dup1,NR_027170.1_dup1,NR_027169.1_dup1,NR_027166.1_dup1,NR_027179.1_dup1,NR_027165.1_dup1,NR_027158.1_dup1,NR_027172.2_dup1,NR_045023.1_dup1,NR_027174.1_dup1,NR_027178.1_dup1,NR_027177.1_dup1,NR_027176.1_dup1,NR_045026.1_dup1
	125144	NC_000017.11	+	16439659	16439703	16439326	16439414	16440184	16440253	708	1620	781	1095	1.38242e-05	0.00475779	NR_027170.1_dup1,NR_027165.1_dup1	NR_027175.1_dup1,NR_027173.1_dup1,NR_027167.1_dup1,NR_027163.1_dup1,NR_027169.1_dup1,NR_027168.2_dup1,NR_027166.1_dup1,NR_027179.1_dup1,NR_027164.1_dup1,NR_027158.1_dup1,NR_027172.2_dup1,NR_045023.1_dup1,NR_027174.1_dup1,NR_027178.1_dup1,NR_027177.1_dup1,NR_027176.1_dup1,NR_045026.1_dup1
DENND5B	160518	NC_000012.12	-	31499605	31499671	31495809	31495919	31590705	31590954	75	72	127	39	0.000119979	0.0317065	XM_017018896.1_dup1,XM_005253330.3_dup1,XM_005253326.2_dup1,XM_017018898.1_dup1,XM_006719040.3_dup1,BGI_novel_T014195	NA
HERC2P3	283755	NC_000015.10	-	20466194	20466370	20462830	20463001	20483402	20483517	31	0	2	7	5.02551e-06	0.00187494	BGI_novel_T016330,BGI_novel_T016328,BGI_novel_T016329,BGI_novel_T016333	NA
ATP11C	286410	NC_000023.11	-	139731650	139731755	139726345	139728962	139737915	139738069	297	172	599	49	0	0	XR_001755684.1_dup1,XM_017029440.1_dup1,XM_017029449.1_dup1,XM_017029444.1_dup1,BGI_novel_T023399,XM_017029441.1_dup1,BGI_novel_T023403,BGI_novel_T023405,XM_017029446.1_dup1,BGI_novel_T023401,NM_173694.4_dup1,XM_017029448.1_dup1,XM_017029442.1_dup1,BGI_novel_T023406,XR_001755685.1_dup1,BGI_novel_T023400,XM_017029439.1_dup1,XR_001755683.1_dup1	NM_001010986.2_dup1,BGI_novel_T023402,BGI_novel_T023404
ARL16	339231	NC_000017.11	-	81682490	81682675	81682033	81682149	81683012	81683126	162	141	184	64	0.000129077	0.0339091	BGI_novel_T019576	BGI_novel_T019578,BGI_novel_T019577,NM_001040025.1_dup1
DUXAP10	503639	NC_000014.9	-	19331834	19331972	19307020	19307111	19333701	19333813	66	73	145	6	0	0	BGI_novel_T015568,NR_110526.1_dup1,BGI_novel_T015569,BGI_novel_T015570	NA
	503639	NC_000014.9	-	19331481	19331617	19307020	19307111	19333701	19333813	79	73	60	6	1.85168e-07	0.000100255	BGI_novel_T015568,NR_110526.1_dup1,BGI_novel_T015569,BGI_novel_T015570	NA
	503639	NC_000014.9	-	19335351	19335462	19333933	19334081	19337579	19337674	11	1	4	44	8.93595e-07	0.000396729	NR_110526.1_dup1	NA
CKMT1A	548596	NC_000015.10	+	43698013	43698148	43696239	43696363	43698640	43698766	10	12	69	6	4.43395e-05	0.0130367	NM_001321926.1_dup1,BGI_novel_T016584,NM_001015001.2_dup1,BGI_novel_T016583,NM_001321929.1_dup1,BGI_novel_T016582,NR_135856.1_dup1,BGI_novel_T016581,XM_005254498.3_dup1,XM_017022370.1_dup1,NM_001321927.1_dup1,NM_001321928.1_dup1,XM_017022369.1_dup1	NA
	548644	NC_000007.14	-	102543524	102543702	102541500	102541662	102544705	102544776	8	20	57	0	2.49556e-12	2.40859e-09	BGI_novel_T009215	BGI_novel_T009216,BGI_novel_T009217
	548644	NC_000007.14	-	102543524	102543830	102541500	102541662	102544705	102544776	16	20	61	0	2.64595e-10	2.02539e-07	BGI_novel_T009217	BGI_novel_T009216,BGI_novel_T009215
	548644	NC_000007.14	-	102543524	102544120	102541500	102541662	102544705	102544776	26	20	69	0	5.49713e-09	3.69782e-06	BGI_novel_T009216	BGI_novel_T009215,BGI_novel_T009217
SNORA27	619499	NC_000013.11	+	27253764	27253843	27249747	27251585	27255241	27255354	229	1	167	22	9.99507e-05	0.027058	BGI_novel_T015235	NA
SMG1P1	641298	NC_000016.10	+	22519137	22519414	22513763	22513921	22523819	22523948	234	136	509	101	1.11114e-08	7.36289e-06	BGI_novel_T017680,BGI_novel_T017676,BGI_novel_T017679	NA
LOC727751	727751	NT_187606.1	+	90165	90254	65104	65434	90509	90698	59	1	4	13	1.46532e-09	1.03263e-06	BGI_novel_T023982,BGI_novel_T023980,BGI_novel_T023981	BGI_novel_T023983
POM121C	100101267	NC_000007.14	-	75484197	75484319	75475061	75475188	75485863	75486340	80	23	88	0	1.71905e-06	0.000725264	BGI_novel_T008998	NA
	100101267	NC_000007.14	-	75484197	75484300	75475061	75475188	75485863	75486347	113	23	120	0	4.26058e-06	0.00161673	BGI_novel_T008999,BGI_novel_T009000	NA
	100101267	NC_000007.14	-	75484197	75484256	75475061	75475188	75485863	75486458	75	23	77	0	1.04762e-05	0.00372091	BGI_novel_T009002	BGI_novel_T009001
MIR1322	100302166	NW_018654717.1	+	2526861	2526938	2520887	2520980	2581284	2582844	8	0	3	23	3.10803e-05	0.00932347	BGI_novel_T024583	BGI_novel_T024584
MIR3680-2	100847041	NW_017852933.1	+	1617198	1617237	1584324	1584989	1620280	1620444	33	3	6	26	5.13608e-09	3.5081e-06	BGI_novel_T024533	NA
U2AF1L5	102724594	NC_000021.9	-	6492130	6492197	6487362	6487412	6493043	6493110	96	62	21	75	5.29999e-07	0.000255765	NM_001320651.1_dup1,BGI_novel_T022024	NM_001320648.1_dup1,XM_017028220.1_dup1
LOC105374600	105374600	NC_000002.12	-	53604273	53604560	53603384	53603518	53604826	53604915	1018	0	639	46	4.55747e-13	4.4964e-10	BGI_novel_T002791,BGI_novel_T002790	NA
LOC107987424	107987424	NW_003315952.3	-	251221	251308	198731	198906	290735	290865	13	9	51	0	2.09753e-05	0.00679738	BGI_novel_T024316	NA
	BGI_novel_G000271	NC_000006.12	+	169776454	169776673	169775939	169776065	169779181	169779295	47	17	128	0	1.7829e-08	1.13079e-05	BGI_novel_T008427	NA
	BGI_novel_G000271	NC_000006.12	+	169775269	169775346	169773318	169773402	169775939	169776065	82	0	31	14	1.2971e-06	0.00056458	BGI_novel_T008427	NA
	BGI_novel_G000349	NC_000008.11	-	143588990	143590081	143586728	143586852	143597347	143597447	147	26	91	223	2.22045e-16	2.66436e-13	BGI_novel_T010350	NA
	BGI_novel_G000350	NC_000008.11	-	143586218	143586290	143581228	143581328	143586728	143586849	127	31	1571	23	1.68828e-10	1.41423e-07	BGI_novel_T010351	NA
	BGI_novel_G000417	NC_000011.10	-	504823	504996	502061	502249	506608	506842	20	44	62	3	1.24012e-13	1.28041e-10	BGI_novel_T012527	NA
	BGI_novel_G000691	NC_000017.11	-	1361901	1362008	1354210	1354347	1364858	1365058	85	12	929	6	0.000135206	0.0353103	BGI_novel_T018388	NA
	BGI_novel_G000868	NC_000023.11	-	152751724	152751822	152751508	152751574	152752393	152752513	5	58	24	5	1.92861e-10	1.55681e-07	BGI_novel_T023453	NA
	BGI_novel_G000868	NC_000023.11	-	152752393	152752513	152751508	152751574	152753787	152753867	66	2	9	14	4.80604e-08	2.92293e-05	BGI_novel_T023453	NA
	BGI_novel_G001114	NT_187607.1	+	1674372	1674498	1667651	1667777	1691001	1691063	37	0	38	22	1.3067e-05	0.00453231	BGI_novel_T024043	NA
	BGI_novel_G001114	NT_187607.1	+	1672366	1672504	1667651	1667777	1691001	1691063	60	0	71	22	2.07276e-05	0.0067665	BGI_novel_T024043	NA
	BGI_novel_G001115	NT_187607.1	+	1726047	1726194	1713980	1714184	1729531	1729619	237	8	226	247	0	0	BGI_novel_T024044	NA

## Sheet: A5SS
	GeneID	Chr	Strand	longExonStart	longExonEnd	shortExonStart	shortExonEnd	flankingExonStart	flankingExonEnd	H69AR-Ctrl-IC	H69AR-Ctrll-SC	H69AR-ESRP1-IC	H69AR-ESRP1-SC	Pvalue	FDR	LongExonTranscripts	ShortExonTranscripts
ADAM15	8751	NC_000001.11	+	155061903	155062117	155061903	155061975	155062244	155062369	402	27	179	162	0	0	NR_048578.1_dup1,NR_048577.1_dup1,NR_048579.1_dup1	NM_207196.2_dup1,NM_207195.2_dup1,NM_207197.2_dup1
GCNT2	2651	NW_018654713.1	+	39514	40720	39514	39725	132234	132327	0	16	123	0	0	0	BGI_novel_T024540,NM_145649.4_dup1,XM_006715052.3_dup1	XM_005248999.2_dup1
CRK	1398	NC_000017.11	-	1436619	1437155	1436789	1437155	1421352	1423650	111	80	177	5	0	0	NM_016823.3_dup1	NM_005206.4_dup1
ARHGEF11	9826	NC_000001.11	-	156938417	156939910	156939547	156939910	156937248	156937496	419	19	284	107	1.11e-16	1.68e-13	BGI_novel_T001711	NM_014784.3_dup1,XM_011510187.2_dup1,XM_011510186.2_dup1,BGI_novel_T001710,XM_006711661.2_dup1,XM_017002922.1_dup1,XM_006711659.2_dup1,XM_017002924.1_dup1,NM_198236.2_dup1,XM_011510185.2_dup1,XM_017002923.1_dup1,XM_006711665.3_dup1,XM_006711662.2_dup1,XM_005245633.4_dup1,XM_017002921.1_dup1,XM_006711660.3_dup1,XM_017002920.1_dup1,BGI_novel_T001709,XM_006711663.3_dup1,XM_011510189.2_dup1,XM_005245…
PLEKHG3	26030	NC_000014.9	+	64737861	64738224	64737861	64738137	64738741	64738855	120	0	37	33	8.88e-16	1.07e-12	BGI_novel_T015899,XM_011536624.2_dup1,XM_017021158.1_dup1,XM_017021155.1_dup1,XM_017021156.1_dup1,BGI_novel_T015900,XM_011536627.2_dup1,XM_017021154.1_dup1,XM_011536628.2_dup1	BGI_novel_T015898,XM_011536625.2_dup1
CSNK1A1	1452	NC_000005.10	-	149505446	149505595	149505482	149505595	149495893	149496860	362	178	189	280	3.27e-12	3.29e-09	NM_001892.5_dup1,NM_001271742.1_dup1,NM_001025105.2_dup1	NM_001271741.1_dup1
PCYT2	5833	NC_000017.11	-	81906982	81907257	81907203	81907257	81906759	81906898	39	0	14	32	3.86e-11	3.33e-08	XM_017024912.1_dup1	NM_001256434.2_dup1,XM_006722287.3_dup1,XM_005256386.3_dup1,XM_005256387.3_dup1,NM_001184917.2_dup1
CARS	833	NC_000011.10	-	3040447	3040984	3040895	3040984	3039834	3039931	35	237	23	3	1.24e-08	9.38e-06	XM_017018391.1_dup1,BGI_novel_T012613	XR_428857.1_dup1,BGI_novel_T012614,XR_001747996.1_dup1,XR_001747995.1_dup1,XR_930913.1_dup1,XM_017018392.1_dup1,XR_930914.2_dup1,NM_001194997.1_dup1,NM_001014437.2_dup1,XR_001747998.1_dup1,NM_139273.3_dup1,NM_001751.5_dup1
HNRNPH3	3189	NC_000010.11	+	68338502	68338687	68338502	68338642	68339139	68339226	1205	415	1026	661	2.35e-08	1.58e-05	XM_017016169.1_dup1,NM_001322434.1_dup1,NM_001322445.1_dup1,NM_001322437.1_dup1,NM_001322448.1_dup1,XM_017016168.1_dup1,NM_001322447.1_dup1,NM_012207.2_dup1,NM_001322436.1_dup1,NM_001322446.1_dup1,NM_001322449.1_dup1	NM_001322452.1_dup1,NM_001322453.1_dup1,NM_001322439.1_dup1,NM_001322451.1_dup1,NM_001322438.1_dup1,NM_001322440.1_dup1,BGI_novel_T011939,NM_001322441.1_dup1,NM_021644.3_dup1
C1orf43	25912	NC_000001.11	-	154220341	154220797	154220418	154220797	154219835	154219937	532	15	506	87	2.73e-08	1.65e-05	NM_001297723.1_dup1,NM_001297720.1_dup1,NM_001297717.1_dup1,NM_001098616.2_dup1	NM_001297718.1_dup1
GSN	2934	NC_000009.12	+	121326511	121326792	121326511	121326682	121327307	121327482	26	204	71	113	5.03e-06	0.00276122	XR_001746283.1_dup1	XM_005251943.1_dup1,BGI_novel_T011054,NM_001127666.1_dup1,XM_017014648.1_dup1,XM_017014645.1_dup1,XM_011518584.1_dup1,NM_001127663.1_dup1,NM_001127665.1_dup1,XM_017014644.1_dup1,XM_011518592.1_dup1,XM_011518589.2_dup1,XM_011518594.1_dup1,XM_017014646.1_dup1,XM_017014647.1_dup1,XM_011518588.2_dup1,NM_001127667.1_dup1,NM_001127662.1_dup1,XM_011518593.1_dup1,XM_011518585.1_dup1,XM_011518591.2_dup1,X…
VPS28	51160	NC_000008.11	-	144425874	144426063	144426025	144426063	144425682	144425772	24	9	4	36	1.16e-05	0.00585731	XM_017013529.1_dup1,XM_005272325.3_dup1	XM_005272324.3_dup1,NM_183057.2_dup1,NM_016208.3_dup1,XM_005272323.3_dup1
KAT6B	23522	NW_009646202.1	+	180074	180457	180074	180130	181991	182113	26	1	1	7	2.37e-05	0.0110133	BGI_novel_T024376,NM_001256468.1_dup1,BGI_novel_T024379,XM_017016005.1_dup1	XM_017016008.1_dup1,BGI_novel_T024377,XM_017016006.1_dup1,XM_017016007.1_dup1,NM_001256469.1_dup1,XM_017016009.1_dup1
HDAC6	10013	NC_000023.11	+	48801873	48802142	48801873	48801944	48802662	48802785	27	12	49	0	4.99e-05	0.0215232	BGI_novel_T023020,BGI_novel_T023025,BGI_novel_T023021	BGI_novel_T023017,NM_001321225.1_dup1,BGI_novel_T023018
	23164	NC_000017.11	+	17137915	17138429	17137915	17138075	17142626	17142765	78	131	191	109	7.16e-05	0.028847	BGI_novel_T018680,XM_011523765.2_dup1,XM_011523767.2_dup1,XM_011523762.2_dup1,XM_011523761.2_dup1,XM_017024393.1_dup1,XM_011523766.2_dup1,XM_011523764.2_dup1,XM_011523763.2_dup1	BGI_novel_T018681,XM_005256563.4_dup1,NM_201274.3_dup1,NM_015134.3_dup1,XM_005256564.4_dup1
SMG1P1	641298	NC_000016.10	+	22491706	22506235	22491706	22491786	22513521	22513610	704	12	1334	1	0.00010813	0.040846	BGI_novel_T017676	BGI_novel_T017679
	641298	NC_000016.10	+	22491706	22507399	22491706	22491786	22513521	22513610	765	12	1408	1	0.000131671	0.0468128	BGI_novel_T017677	BGI_novel_T017679

## Sheet: A3SS
	GeneID	Chr	Strand	longExonStart	longExonEnd	shortExonStart	shortExonEnd	flankingExonStart	flankingExonEnd	H69AR-Ctrl-IC	H69AR-Ctrll-SC	H69AR-ESRP1-IC	H69AR-ESRP1-SC	Pvalue	FDR	LongExonTranscripts	ShortExonTranscripts
CKMT1B	1159	NC_000015.10	+	43597375	43598327	43598192	43598327	43596407	43596531	278	235	316	76	6.03e-09	7.99e-06	NR_135751.1_dup1,NR_135749.1_dup1,NR_135752.1_dup1,NR_135748.1_dup1,NR_135750.1_dup1	XM_011521198.1_dup1,XM_017021902.1_dup1,XM_011521196.1_dup1,XM_011521194.1_dup1,XM_005254150.3_dup1,BGI_novel_T016573,XM_011521197.2_dup1,NM_020990.4_dup1,BGI_novel_T016574,XM_011521195.2_dup1,XM_011521199.2_dup1
COX4I1	1327	NC_000016.10	+	85806455	85807003	85806759	85807003	85805732	85805864	149	31	165	0	7.11e-09	7.99e-06	NM_001318794.1_dup1	NM_001318788.1_dup1
	1327	NC_000016.10	+	85806759	85807003	85806826	85807003	85805732	85805864	31	20	0	24	3.93e-07	0.000338909	NM_001318788.1_dup1	BGI_novel_T018269,NM_001318802.1_dup1
FGFR1	2260	NC_000008.11	-	38421796	38423175	38421796	38421941	38424508	38424699	273	359	1014	241	0	0	BGI_novel_T009920,BGI_novel_T009916,BGI_novel_T009925,XM_017013230.1_dup1,BGI_novel_T009923	NM_001174067.1_dup1,XM_006716304.1_dup1,XM_017013227.1_dup1,NM_015850.3_dup1,XM_017013228.1_dup1,XM_006716303.2_dup1,XM_006716307.1_dup1,BGI_novel_T009915,XM_006716310.2_dup1,BGI_novel_T009924,XM_011544447.2_dup1,XM_011544449.1_dup1,NM_001174064.1_dup1,XM_017013224.1_dup1,XR_001745496.1_dup1,NM_001174063.1_dup1,XM_017013220.1_dup1,XM_006716314.1_dup1,BGI_novel_T009922,XM_006716306.2_dup1,BGI_nove…
PKD1	5310	NC_000016.10	-	2105321	2105707	2105321	2105662	2105864	2106024	18	10	5	36	7.11e-05	0.040898	BGI_novel_T017369	BGI_novel_T017375,BGI_novel_T017372
RBFOX2	23543	NC_000022.11	-	35781599	35781746	35781599	35781743	35809779	35810004	3	173	56	19	0	0	XM_017028693.1_dup1,XM_017028690.1_dup1,XM_005261430.2_dup1,NM_014309.2_dup1,XM_017028687.1_dup1,XM_005261433.2_dup1,XM_017028696.1_dup1,XM_006724193.3_dup1,XM_005261437.1_dup1,XM_006724192.2_dup1,XM_017028686.1_dup1,NM_001082578.1_dup1,XM_006724187.2_dup1,XM_006724185.2_dup1,XM_006724188.2_dup1,XM_005261431.2_dup1,XM_006724189.3_dup1,XM_006724191.1_dup1,XM_005261428.2_dup1	XM_017028695.1_dup1,NM_001082579.1_dup1,NM_001031695.2_dup1,NM_001082577.1_dup1,XM_006724190.1_dup1,XM_005261429.2_dup1,XM_017028691.1_dup1,XM_017028694.1_dup1,XM_017028697.1_dup1,XM_017028698.1_dup1,XM_017028689.1_dup1,XM_005261435.1_dup1,NM_001082576.1_dup1,XM_006724186.2_dup1,XM_005261432.2_dup1,XM_017028688.1_dup1,XM_006724194.2_dup1,XM_017028692.1_dup1
STAG3L1	54441	NC_000007.14	+	75365951	75377593	75366323	75377593	75365563	75365643	56	0	7	7	7.85e-06	0.0054253	BGI_novel_T008988	BGI_novel_T008991,BGI_novel_T008990
SMPD4	55627	NC_000002.12	-	130157250	130161272	130157250	130157396	130164373	130164445	506	70	1133	44	2.18e-06	0.00167084	BGI_novel_T003324	XM_017004449.1_dup1,NR_033232.2_dup1,NR_033230.2_dup1,XM_011511445.2_dup1,NR_033231.2_dup1,NM_001171083.2_dup1,XM_017004448.1_dup1,NM_017951.4_dup1,NM_017751.4_dup1,XM_011511443.2_dup1,XM_011511444.2_dup1
MAGED4B	81557	NC_000023.11	+	52185891	52186132	52185921	52186132	52184822	52184965	133	72	9	71	9.33e-15	1.61e-11	NM_030801.3_dup1	NM_177537.2_dup1,NM_177535.2_dup1
ATP5IF1	93974	NW_018654706.1	+	31404	31749	31480	31749	30004	30096	46	35	0	33	8.1e-09	7.99e-06	NM_178190.2_dup1	NM_016311.4_dup1
NBPF12	149013	NC_000001.11	+	146959858	146960318	146960108	146960318	146951107	146951489	2	6	43	1	2.48e-05	0.0155969	BGI_novel_T001346	BGI_novel_T001345
CYB561A3	220002	NC_000011.10	-	61348744	61350422	61348744	61349643	61350990	61351147	450	5	172	83	0	0	NM_153611.4_dup1,NM_001161454.1_dup1,NM_001161452.1_dup1	BGI_novel_T012996

## Sheet: MXE
	GeneID	Chr	Strand	1stExonStart	1stExonEnd	2ndExonStart	2ndExonEnd	upstreamExonStart	upstreamExonEnd	downstreamExonStart	downstreamExonEnd	H69AR-Ctrl-IC	H69AR-Ctrll-SC	H69AR-ESRP1-IC	H69AR-ESRP1-SC	Pvalue	FDR	1stExonTranscripts	2ndExonTranscripts
ACTN4	81	NW_014040929.1	+	137581	137662	137951	138017	136592	136739	138631	138790	1259	10	64	16	2.72e-06	0.000611472	BGI_novel_T024463,XM_017027331.1_dup1,NM_004924.5_dup1,XM_006723406.2_dup1	NM_001322033.1_dup1,XM_005259281.4_dup1
CD44	960	NC_000011.10	+	35214851	35214914	35219315	35219387	35189834	35190065	35221653	35221732	210	114	65	166	8.76e-14	5.26e-11	XM_005253238.2_dup1,XM_011520484.1_dup1,NM_001202555.1_dup1,BGI_novel_T012828,BGI_novel_T012829,BGI_novel_T012830,NM_000610.3_dup1,XM_017018585.1_dup1,NM_001202557.1_dup1,XM_017018584.1_dup1,XM_017018583.1_dup1,XM_005253240.2_dup1,XM_011520488.1_dup1,XM_005253239.2_dup1,NM_001001389.1_dup1,XM_011520482.1_dup1,XM_005253232.2_dup1,XM_005253233.2_dup1,NM_001001390.1_dup1,XM_005253234.2_dup1,NM_00100…	NM_001202556.1_dup1
	960	NC_000011.10	+	35209964	35210054	35211245	35211449	35208104	35208206	35214851	35214914	0	36	310	648	5.14e-06	0.00112885	XM_005253238.2_dup1,XM_011520484.1_dup1,BGI_novel_T012828,BGI_novel_T012829,BGI_novel_T012830,NM_000610.3_dup1,XM_017018583.1_dup1,XM_005253240.2_dup1,XM_011520488.1_dup1,XM_005253239.2_dup1,NM_001001389.1_dup1,XM_011520482.1_dup1,XM_005253232.2_dup1,XM_005253233.2_dup1,NM_001001390.1_dup1,XM_005253234.2_dup1,XM_005253235.2_dup1,XM_011520483.1_dup1,XM_006718388.1_dup1,XM_005253231.2_dup1,XM_01152…	NA
AP3S1	1176	NC_000005.10	+	115895086	115895158	115902884	115902992	115870016	115870128	115913361	115914081	104	347	7	346	3.11e-15	2.33e-12	NM_001318094.1_dup1,NM_001318093.1_dup1,NM_001284.3_dup1,NM_001002924.2_dup1	NM_001318091.1_dup1
	1176	NC_000005.10	+	115866669	115866761	115870016	115870128	115841605	115842106	115895086	115895158	161	122	191	20	2.54e-13	1.43e-10	NM_001318094.1_dup1,NM_001318093.1_dup1,NM_001284.3_dup1,XM_011543136.2_dup1,XM_017009024.1_dup1,NM_001002924.2_dup1	NA
CTNND1	1500	NC_000011.10	+	57791384	57791673	57794009	57794081	57761761	57762046	57795576	57795729	117	94	46	149	5.05e-07	0.000122873	NM_001085460.1_dup1,NM_001085462.1_dup1	NM_001206884.1_dup1,NM_001206886.1_dup1,NM_001206883.1_dup1,NM_001085463.1_dup1,NM_001206887.1_dup1,NM_001085464.1_dup1,NM_001206889.1_dup1,NM_001085465.1_dup1,NM_001085466.1_dup1,NM_001206888.1_dup1,NM_001085468.1_dup1
	1500	NC_000011.10	+	57791493	57791673	57794009	57794081	57761761	57762046	57795576	57795729	53	94	18	149	0.000178923	0.0287523	NM_001206884.1_dup1,NM_001206886.1_dup1,NM_001206883.1_dup1,NM_001206887.1_dup1,NM_001206889.1_dup1,NM_001206888.1_dup1	NM_001085460.1_dup1,NM_001085463.1_dup1,NM_001085462.1_dup1,NM_001085464.1_dup1,NM_001085465.1_dup1,NM_001085466.1_dup1,NM_001085468.1_dup1
DNM2	1785	NC_000019.10	+	10796060	10796199	10797379	10797518	10795371	10795439	10798485	10798572	66	523	348	382	0	0	BGI_novel_T020293,NM_001005360.2_dup1,NM_004945.3_dup1,NM_001190716.1_dup1	NM_001005362.2_dup1,BGI_novel_T020291,BGI_novel_T020294,NM_001005361.2_dup1
EYA4	2070	NC_000006.12	+	133525014	133525115	133525153	133525254	133523055	133523177	133528724	133532120	62	45	24	115	4.91e-09	1.7e-06	BGI_novel_T008210,XM_017010374.1_dup1,XM_005266851.4_dup1,XM_005266853.4_dup1,NM_172105.3_dup1,NM_001301012.1_dup1	NM_001301013.1_dup1,NM_172103.3_dup1,XM_017010375.1_dup1,NM_004100.4_dup1
FGFR3	2261	NC_000004.12	+	1802913	1803064	1803691	1803836	1801834	1802025	1804329	1804520	38	272	108	73	0	0	NM_001163213.1_dup1,XM_006713871.1_dup1,XM_006713870.1_dup1	XM_006713872.1_dup1,NM_000142.4_dup1,XM_011513422.1_dup1,XM_006713873.1_dup1
FGFR2	2263	NC_000010.11	-	121517318	121517463	121518681	121518829	121515116	121515319	121519978	121520169	4	364	409	67	0	0	XM_017015924.1_dup1,NM_023029.2_dup1,NR_073009.1_dup1,NM_000141.4_dup1,NM_001144915.1_dup1,NM_001144916.1_dup1,NM_001320654.1_dup1	XM_006717711.2_dup1,NM_001144913.1_dup1,XM_006717710.3_dup1,NM_022970.3_dup1,XM_006717712.2_dup1,NM_001144919.1_dup1
HNRNPL	3191	NW_014040929.1	-	248565	248687	249767	250048	248068	248270	250159	250231	2072	3339	165	88	7.95e-11	3.25e-08	XM_011526886.1_dup1,XM_011526887.1_dup1,XM_011526888.2_dup1,NM_001533.2_dup1,NM_001005335.1_dup1,XM_011526889.1_dup1,BGI_novel_T024484	NA
ABCC1	4363	NC_000016.10	+	16009775	16009901	16014490	16014628	16007815	16007992	16016495	16016621	407	207	226	382	0	0	XM_011522498.2_dup1,BGI_novel_T017566,NM_004996.3_dup1,BGI_novel_T017565,BGI_novel_T017567,XM_017023239.1_dup1,XM_017023240.1_dup1,XM_017023243.1_dup1,XM_017023237.1_dup1,XM_017023242.1_dup1,XM_011522497.1_dup1	NA
	4363	NC_000016.10	+	16048141	16048303	16052723	16052816	16045835	16046013	16056091	16056295	256	547	856	758	7.69e-14	5.26e-11	XM_011522498.2_dup1,BGI_novel_T017566,NM_004996.3_dup1,BGI_novel_T017565,BGI_novel_T017567,XM_017023241.1_dup1,XM_017023239.1_dup1,XM_017023240.1_dup1,BGI_novel_T017569,XM_017023243.1_dup1,BGI_novel_T017568,XM_017023237.1_dup1,XM_017023242.1_dup1,XM_011522497.1_dup1,XM_017023238.1_dup1	NA
	4363	NC_000016.10	+	16009775	16009901	16016495	16016621	16007815	16007992	16033108	16033170	407	503	204	636	8e-12	4e-09	XM_011522498.2_dup1,BGI_novel_T017566,NM_004996.3_dup1,BGI_novel_T017565,BGI_novel_T017567,XM_017023241.1_dup1,XM_017023239.1_dup1,XM_017023240.1_dup1,BGI_novel_T017569,XM_017023243.1_dup1,BGI_novel_T017568,XM_017023237.1_dup1,XM_017023242.1_dup1,XM_011522497.1_dup1,XM_017023238.1_dup1	NA
	4363	NC_000016.10	+	16036471	16036603	16044449	16044680	16033108	16033170	16045835	16046013	1228	3004	1386	5335	4.82e-07	0.000120369	XM_011522498.2_dup1,BGI_novel_T017566,NM_004996.3_dup1,BGI_novel_T017565,BGI_novel_T017567,XM_017023241.1_dup1,XM_017023239.1_dup1,XM_017023240.1_dup1,BGI_novel_T017569,XM_017023243.1_dup1,BGI_novel_T017568,XM_017023237.1_dup1,XM_017023242.1_dup1,XM_011522497.1_dup1,XM_017023238.1_dup1	NA
PCYT2	5833	NC_000017.11	-	81907203	81907257	81907553	81907598	81906759	81906898	81907772	81907857	191	1	144	32	2.01e-05	0.00420132	NM_001256434.2_dup1,XM_006722287.3_dup1,XM_005256386.3_dup1,XM_005256387.3_dup1,NM_001184917.2_dup1	NM_001256433.2_dup1,XM_017024911.1_dup1,NM_001256435.2_dup1,NM_001282204.1_dup1,NM_002861.4_dup1,XM_017024912.1_dup1,XM_017024910.1_dup1,NM_001282203.1_dup1
TADA2A	6871	NC_000017.11	+	37423508	37423615	37426949	37427009	37411268	37411390	37437737	37437829	92	6	78	32	0.000186725	0.0289713	XM_017024982.1_dup1,NM_001488.4_dup1,XM_017024986.1_dup1,NM_001166105.2_dup1,NM_133439.3_dup1,NM_001291918.1_dup1,XM_017024981.1_dup1,BGI_novel_T018913	XM_011525153.2_dup1,XM_011525154.2_dup1
ADAM15	8751	NC_000001.11	+	155060762	155060832	155061903	155061975	155060204	155060343	155062244	155062369	912	27	847	163	7.18e-11	3.08e-08	NM_207196.2_dup1,NM_207195.2_dup1,NR_048578.1_dup1,NR_048577.1_dup1,NM_001261464.1_dup1,NM_003815.4_dup1,NR_048579.1_dup1,NM_207194.2_dup1,NM_207197.2_dup1	NA
	8751	NC_000001.11	+	155061417	155061489	155061903	155061975	155060762	155060832	155062244	155062369	82	39	111	217	4.22e-08	1.36e-05	NM_207196.2_dup1,NR_048577.1_dup1	NM_207195.2_dup1,NM_207197.2_dup1
	8751	NC_000001.11	+	155061417	155061489	155061903	155062117	155060204	155060343	155062244	155062369	29	439	60	197	9.33e-08	2.71e-05	NM_207196.2_dup1,NM_001261465.1_dup1,NR_048577.1_dup1	NR_048578.1_dup1,NR_048579.1_dup1
	8751	NC_000001.11	+	155061414	155061489	155061903	155062117	155060762	155060832	155062244	155062369	59	451	105	251	1.09e-07	3.08e-05	NR_048578.1_dup1,NM_207194.2_dup1,NM_207197.2_dup1	NR_048577.1_dup1,NR_048579.1_dup1
	8751	NC_000001.11	+	155061417	155061489	155061903	155062117	155060762	155060832	155062244	155062369	82	451	111	251	3.62e-05	0.00724169	NM_207196.2_dup1,NR_048577.1_dup1	NR_048578.1_dup1,NR_048579.1_dup1
	8751	NC_000001.11	+	155061414	155061489	155061903	155061975	155060762	155060832	155062244	155062369	59	39	105	217	8.42e-05	0.0154688	NR_048578.1_dup1,NM_207194.2_dup1,NM_207197.2_dup1	NM_207196.2_dup1,NM_207195.2_dup1
MPDU1	9526	NC_000017.11	+	7585945	7586078	7586691	7586838	7585731	7585797	7587160	7587271	208	14	199	153	0	0	XM_006721599.2_dup1,NM_004870.3_dup1,XM_006721597.2_dup1,XM_011524081.2_dup1	NA
	9526	NC_000017.11	+	7586691	7586838	7586898	7587017	7585731	7585797	7587160	7587271	14	491	153	302	0	0	XM_006721599.2_dup1	NM_004870.3_dup1,XM_011524081.2_dup1,NR_024603.1_dup1
	9526	NC_000017.11	+	7585950	7586078	7586691	7586838	7585731	7585797	7587160	7587271	103	14	99	153	1.11e-16	9.99e-14	NR_024603.1_dup1	XM_006721599.2_dup1
	9526	NC_000017.11	+	7586691	7586838	7586898	7587017	7585945	7586078	7587160	7587271	379	493	484	302	8.26e-08	2.48e-05	XM_006721599.2_dup1	NM_004870.3_dup1,XM_011524081.2_dup1
SUGP2	10147	NC_000019.10	-	18991339	18991540	18993637	18993740	18990887	18991149	18994365	18994486	404	1013	526	731	2.06e-06	0.000476232	XR_001753576.1_dup1	XR_430122.3_dup1,XR_936143.2_dup1
	10147	NC_000019.10	-	18991339	18991540	18993647	18993740	18990887	18991149	18994365	18994486	350	1013	441	731	4.51e-05	0.00881733	XR_001753576.1_dup1	XR_430124.3_dup1,XR_001753580.1_dup1
HNRNPR	10236	NW_014040926.1	-	93534	93711	103496	103610	91506	91642	107732	107840	42	371	95	55	0	0	NM_005826.4_dup1,NM_001102397.2_dup1,NM_001102398.2_dup1,XM_011540474.2_dup1,XM_011540476.2_dup1,NM_001297622.1_dup1,XM_005245711.4_dup1,XM_011540471.2_dup1,XM_017000008.1_dup1,NM_001297620.1_dup1,XM_011540475.2_dup1,BGI_novel_T024447,NM_001102399.2_dup1	XM_017000009.1_dup1,NM_001297621.1_dup1,XM_011540472.2_dup1,XM_017000010.1_dup1,XM_011540477.2_dup1
DEAF1	10522	NC_000011.10	-	646326	646555	651161	651407	644224	644654	653961	654051	15	1	2	23	1.35e-07	3.69e-05	XR_001747725.1_dup1	XR_428838.2_dup1
FNBP1	23048	NC_000009.12	-	129915965	129915980	129923843	129923939	129908889	129908999	129924959	129925157	62	0	31	13	1.12e-05	0.0023972	XM_017014492.1_dup1,XM_017014491.1_dup1,XM_017014493.1_dup1,XM_005251831.2_dup1,XM_005251825.2_dup1,XM_005251820.2_dup1,XM_017014487.1_dup1,XM_011518399.2_dup1,XM_011518401.1_dup1,XM_005251826.2_dup1,XM_005251815.2_dup1,XM_011518400.2_dup1,XM_017014489.1_dup1,XM_011518402.1_dup1,XM_005251829.2_dup1,XM_017014494.1_dup1,XM_017014490.1_dup1,XM_006717016.2_dup1,XM_017014488.1_dup1,XM_005251821.2_dup1…	XM_005251830.2_dup1
	23048	NC_000009.12	-	129915965	129915980	129923843	129923996	129908889	129908999	129924959	129925157	113	0	80	13	5.44e-05	0.0104173	XM_017014492.1_dup1,XM_017014491.1_dup1,XM_017014493.1_dup1,XM_005251831.2_dup1,XM_005251825.2_dup1,XM_005251820.2_dup1,XM_017014487.1_dup1,XM_011518399.2_dup1,XM_011518401.1_dup1,XM_005251826.2_dup1,XM_005251815.2_dup1,XM_011518400.2_dup1,XM_017014489.1_dup1,XM_011518402.1_dup1,XM_005251829.2_dup1,XM_017014494.1_dup1,XM_017014490.1_dup1,XM_006717016.2_dup1,XM_017014488.1_dup1,XM_005251821.2_dup1…	BGI_novel_T011227,XM_005251828.2_dup1,XM_005251827.2_dup1
	23048	NC_000009.12	-	129915965	129915980	129923843	129924026	129908889	129908999	129924959	129925157	131	0	100	13	8.07e-05	0.0151203	XM_017014492.1_dup1,XM_017014491.1_dup1,XM_017014493.1_dup1,XM_005251831.2_dup1,XM_005251825.2_dup1,XM_005251820.2_dup1,XM_017014487.1_dup1,XM_011518399.2_dup1,XM_011518401.1_dup1,XM_005251826.2_dup1,XM_005251815.2_dup1,XM_011518400.2_dup1,XM_017014489.1_dup1,XM_011518402.1_dup1,XM_005251829.2_dup1,XM_017014494.1_dup1,XM_017014490.1_dup1,XM_006717016.2_dup1,XM_017014488.1_dup1,XM_005251821.2_dup1…	XM_005251823.2_dup1,XM_005251822.2_dup1,XM_005251824.2_dup1
EXOC7	23265	NC_000017.11	-	76090328	76090397	76091142	76091235	76089174	76089320	76094413	76094581	51	6	14	15	0.000327749	0.0491569	NM_001145298.3_dup1,XM_006721788.3_dup1,XM_006721786.3_dup1,XM_011524571.2_dup1,BGI_novel_T019445,XR_001752458.1_dup1,NM_001145299.3_dup1	NM_001145297.3_dup1,XM_006721787.3_dup1,NM_001282313.1_dup1,NM_001013839.3_dup1
ZNF451	26036	NC_000006.12	+	57099060	57099141	57124733	57124859	57090810	57090894	57128728	57128840	52	99	0	94	1.39e-11	6.25e-09	BGI_novel_T007884,XM_011514462.2_dup1,BGI_novel_T007883,XM_005248994.1_dup1,NM_001031623.2_dup1,XR_241885.1_dup1,NM_015555.2_dup1,XR_001743327.1_dup1	NA
GALNT7	51809	NC_000004.12	+	173297794	173297977	173298114	173298297	173295763	173295843	173302046	173302164	72	112	14	234	8.28e-14	5.26e-11	XM_005263062.1_dup1,XM_017008293.1_dup1	XM_011532025.2_dup1,XM_017008292.1_dup1,BGI_novel_T006352,NM_017423.2_dup1
	51809	NC_000004.12	+	173297794	173297977	173298114	173298297	173295395	173295526	173302046	173302164	62	91	14	179	1.35e-10	5.3e-08	XM_005263062.1_dup1,XM_017008293.1_dup1	XM_011532025.2_dup1,XM_017008292.1_dup1,BGI_novel_T006352,NM_017423.2_dup1
	54806	NC_000006.12	-	135457493	135457713	135463124	135463306	135455733	135455926	135465813	135466373	142	107	85	160	0.000102735	0.0174437	XM_017010978.1_dup1,BGI_novel_T008217,XR_001743485.1_dup1,XM_017010977.1_dup1,XR_001743482.1_dup1,XR_001743479.1_dup1,XM_017010979.1_dup1,XR_001743480.1_dup1,XR_001743490.1_dup1,XR_001743488.1_dup1,NM_001134831.1_dup1,BGI_novel_T008222,XR_001743492.1_dup1,XM_011535910.2_dup1,XR_001743487.1_dup1,XR_001743486.1_dup1,NM_017651.4_dup1,XM_017010983.1_dup1,XM_017010982.1_dup1,BGI_novel_T008215,NM_00113…	NA
USP35	57558	NC_000011.10	+	78214977	78215115	78220788	78221586	78213645	78213856	78224609	78224729	5	0	1	22	0.000102086	0.0174437	XR_001747931.1_dup1	XR_001747930.1_dup1
LAS1L	81887	NC_000023.11	-	65524055	65524262	65524563	65524614	65523559	65523707	65524964	65525050	242	1086	93	1394	2.78e-15	2.27e-12	XM_011531046.1_dup1,BGI_novel_T023130,XM_017029880.1_dup1,BGI_novel_T023132,XM_017029879.1_dup1,XM_005262304.1_dup1,XR_001755733.1_dup1,NM_001170649.1_dup1,XM_005262301.1_dup1,XM_005262305.3_dup1,XM_005262306.3_dup1,XM_017029878.1_dup1,NM_031206.4_dup1,BGI_novel_T023131,XR_001755731.1_dup1,BGI_novel_T023134,BGI_novel_T023135,BGI_novel_T023133,XR_938412.1_dup1,XR_244504.1_dup1,XR_001755732.1_dup1,…	NA
ARMC10	83787	NC_000007.14	+	103092476	103092653	103097276	103097348	103086629	103086764	103098298	103099763	219	26	164	69	2.05e-05	0.00420132	NM_031905.4_dup1,XM_017012687.1_dup1,XM_017012685.1_dup1,NM_001161011.2_dup1,NM_001161009.2_dup1,BGI_novel_T009248,XM_011516602.2_dup1,XM_017012684.1_dup1,XM_011516601.2_dup1	NM_001161010.2_dup1,XM_017012686.1_dup1,NM_001161012.2_dup1
FOPNL	123811	NC_000016.10	-	15879803	15879888	15884007	15884205	15865718	15867516	15888557	15888649	524	296	550	6	0	0	NM_001304500.1_dup1,NM_001304498.1_dup1,NM_144600.3_dup1,NM_001304502.1_dup1,NR_130756.1_dup1,NM_001304499.1_dup1	NM_001304497.1_dup1,NR_130755.1_dup1
	123811	NC_000016.10	-	15879803	15879888	15884007	15884205	15873490	15873627	15888557	15888649	692	308	723	129	1.66e-09	6.22e-07	NM_001304500.1_dup1,NM_144600.3_dup1,NR_130756.1_dup1,NM_001304499.1_dup1	NR_130755.1_dup1
	123811	NC_000016.10	-	15873490	15873627	15879803	15879888	15865718	15867516	15884007	15884205	446	521	220	519	9.53e-07	0.000225707	NR_130755.1_dup1,NM_144600.3_dup1,NR_130756.1_dup1,NM_001304499.1_dup1	NM_001304498.1_dup1,NM_001304502.1_dup1
LRRC75A-AS1	125144	NC_000017.11	+	16439326	16439414	16439580	16439703	16438986	16439060	16440184	16440253	1721	916	1184	1077	6.4e-08	1.99e-05	NR_027175.1_dup1,NR_027173.1_dup1,NR_027167.1_dup1,NR_027163.1_dup1,NR_027170.1_dup1,NR_027169.1_dup1,NR_027166.1_dup1,NR_027179.1_dup1,NR_027165.1_dup1,NR_027164.1_dup1,NR_027158.1_dup1,NR_045023.1_dup1,NR_027174.1_dup1,NR_027178.1_dup1,NR_027177.1_dup1,NR_027176.1_dup1,NR_045026.1_dup1	NA
B3GNTL1	146712	NC_000017.11	-	82965650	82965746	83005114	83005210	82961056	82961181	83014453	83014519	9	28	16	3	8.87e-05	0.0159714	XM_017024206.1_dup1,XR_933928.2_dup1,XM_006722272.3_dup1,XR_001752431.1_dup1,NM_001320742.1_dup1,XR_933927.2_dup1,XR_001752429.1_dup1,XR_001752430.1_dup1,NM_001009905.2_dup1,BGI_novel_T019646,NR_135465.1_dup1	XM_017024205.1_dup1
NSUN5P1	155400	NC_000007.14	+	75410605	75410726	75412788	75412932	75410321	75410460	75414884	75415023	133	85	25	106	4.41e-12	2.33e-09	NR_104013.1_dup1,NR_033322.3_dup1	BGI_novel_T008995
METTL15	196074	NC_000011.10	+	28290205	28290397	28296752	28296931	28211061	28211198	28330395	28333508	46	35	14	54	9.18e-05	0.0162026	XM_017017298.1_dup1,XR_001747787.1_dup1,XM_011519935.2_dup1,XM_017017300.1_dup1,XM_017017297.1_dup1,XM_011519937.2_dup1,XM_017017299.1_dup1,XM_011519940.2_dup1,BGI_novel_T012800,XM_017017303.1_dup1	NA
	196074	NC_000011.10	+	28290205	28290397	28296796	28296931	28211061	28211198	28330395	28333508	46	32	14	48	0.000185659	0.0289713	XM_017017298.1_dup1,XR_001747787.1_dup1,XM_011519935.2_dup1,XM_017017300.1_dup1,XM_017017297.1_dup1,XM_011519937.2_dup1,XM_017017299.1_dup1,XM_011519940.2_dup1,BGI_novel_T012800,XM_017017303.1_dup1	XM_011519941.2_dup1
DUXAP10	503639	NC_000014.9	-	19307020	19307111	19331834	19331972	19261625	19296351	19333701	19333813	38	174	138	150	4.76e-09	1.7e-06	BGI_novel_T015568	NA
	503639	NC_000014.9	-	19331481	19331617	19331834	19331972	19307020	19307111	19333701	19333813	66	79	145	60	0.000149034	0.0243847	BGI_novel_T015568,NR_110526.1_dup1,BGI_novel_T015569,BGI_novel_T015570	NA
NPIPA8	101059953	NT_187607.1	+	1975868	1976052	1976895	1977011	1975078	1975750	1977421	1977548	44	70	126	43	1.58e-07	4.06e-05	BGI_novel_T024048,BGI_novel_T024056,BGI_novel_T024047	NA
	107984841	NC_000001.11	-	733306	733364	736712	736770	732980	733213	738833	739024	37	33	65	2	1.58e-08	5.25e-06	BGI_novel_T000021,BGI_novel_T000020	NA
	BGI_novel_G000691	NC_000017.11	-	1354210	1354347	1361091	1361298	1344535	1345499	1361901	1362008	218	2711	1920	113	0	0	BGI_novel_T018388	NA
	BGI_novel_G000696	NC_000017.11	-	18333165	18333288	18335558	18335675	18330554	18330671	18340042	18340255	18	138	10	6	0.000137848	0.0229721	BGI_novel_T018719	NA
	BGI_novel_G000922	NT_167245.2	+	1198309	1198579	1198820	1199096	1198048	1198179	1199696	1199972	405	237	273	37	8.88e-12	4.21e-09	BGI_novel_T023648	NA
	BGI_novel_G001114	NT_187607.1	+	1734177	1734253	1737203	1737330	1729531	1729619	1741222	1741399	65	128	127	99	0.000319776	0.0487739	BGI_novel_T024043	NA
	BGI_novel_G001247	NW_003315970.2	-	110103	110234	113912	114050	109690	109832	115381	115590	8	150	16	14	1.47e-07	3.89e-05	BGI_novel_T024327	NA

## Sheet: RI
	GeneID	Chr	Strand	riExonStart	riExonEnd	upstreamExonStart	upstreamExonEnd	downstreamExonStart	downstreamExonEnd	H69AR-Ctrl-IC	H69AR-Ctrll-SC	H69AR-ESRP1-IC	H69AR-ESRP1-SC	Pvalue	FDR	RetainTranscripts	AbandonTranscripts
CBS	875	NC_000021.9	-	43059225	43060546	43059225	43059303	43060440	43060546	35	72	26	2	9.32e-05	0.0197081	NA	XM_017028492.1_dup1,NM_001178009.2_dup1,XM_017028490.1_dup1,XM_011529776.2_dup1,XM_011529782.1_dup1,BGI_novel_T022203,XM_011529775.2_dup1,BGI_novel_T022207,NM_000071.2_dup1,XM_011529774.2_dup1,XM_017028491.1_dup1,NM_001178008.2_dup1,BGI_novel_T022205,XM_011529773.2_dup1,NM_001320298.1_dup1,XR_001754916.1_dup1,XM_011529781.1_dup1,XR_001754915.1_dup1,XM_011529783.2_dup1,NM_001321072.1_dup1,XR_00175…
CLK2	1196	NW_003315906.1	-	73315	74739	73315	73382	74510	74739	53	20	67	0	4.71e-06	0.00135157	NA	NM_003993.3_dup1,XM_017000241.1_dup1,XM_017000242.1_dup1,NM_001294339.1_dup1,NM_001294338.1_dup1,XM_011509144.1_dup1,XR_241067.2_dup1
DNM2	1785	NC_000019.10	+	10795371	10798572	10795371	10797518	10798485	10798572	91	292	368	190	9.2e-11	9.24e-08	NA	BGI_novel_T020292
	1785	NC_000019.10	+	10795371	10797518	10795371	10795439	10797379	10797518	444	150	961	93	3.34e-09	2.68e-06	NA	NM_001005362.2_dup1,BGI_novel_T020291,BGI_novel_T020294,NM_001005361.2_dup1
EYA4	2070	NC_000006.12	+	133525153	133532120	133525153	133525254	133528724	133532120	699	12	744	60	4.07e-06	0.00125837	NA	NM_001301013.1_dup1,NM_172103.3_dup1,XM_017010375.1_dup1,NM_004100.4_dup1
	2070	NC_000006.12	+	133525014	133532120	133525014	133525115	133528724	133532120	715	30	765	5	7.03e-05	0.0156919	NA	BGI_novel_T008210,XM_017010374.1_dup1,XM_005266851.4_dup1,XM_005266853.4_dup1,NM_172105.3_dup1,NM_001301012.1_dup1
FGFR3	2261	NC_000004.12	+	1801834	1803836	1801834	1802025	1803691	1803836	521	82	689	5	0	0	NA	XM_011513420.1_dup1,XM_006713872.1_dup1,NM_000142.4_dup1,XM_011513422.1_dup1,XM_006713873.1_dup1
	2261	NC_000004.12	+	1803691	1804520	1803691	1803836	1804329	1804520	170	138	299	35	0	0	NA	XM_006713872.1_dup1,NM_000142.4_dup1,XM_011513422.1_dup1,XM_006713873.1_dup1
IKBKB	3551	NC_000008.11	+	42318551	42319421	42318551	42318675	42319269	42319421	106	115	230	80	2.07e-05	0.00520139	NA	XM_011544520.2_dup1,XM_005273493.3_dup1,NM_001190720.2_dup1,XM_011544517.2_dup1,XR_001745530.1_dup1,XM_017013396.1_dup1,NM_001242778.1_dup1,XM_005273495.2_dup1,XR_949402.2_dup1,XM_005273498.3_dup1,XM_005273490.2_dup1,XM_005273492.3_dup1,XM_005273494.2_dup1,XM_005273491.4_dup1,XM_011544519.2_dup1,XM_011544521.2_dup1,NR_033818.1_dup1,XM_005273496.3_dup1,XM_011544522.2_dup1,NM_001556.2_dup1,NR_04000…
SRSF6	6431	NC_000020.11	+	43459152	43459895	43459152	43459420	43459770	43459895	321	119	452	66	1.31e-05	0.00349875	NA	NR_034009.1_dup1
CUL7	9820	NC_000006.12	-	43046510	43047107	43046510	43046601	43046879	43047107	67	85	136	42	8.05e-07	0.000323647	NA	BGI_novel_T007776,BGI_novel_T007784,XM_017011539.1_dup1,XM_017011536.1_dup1,BGI_novel_T007779,BGI_novel_T007783,XM_006715285.1_dup1,NM_014780.4_dup1,BGI_novel_T007778,BGI_novel_T007775,XM_017011537.1_dup1,XM_005249503.2_dup1,XM_011515021.1_dup1,BGI_novel_T007777,XM_017011533.1_dup1,XM_017011538.1_dup1,BGI_novel_T007789,XM_011515019.2_dup1,XM_017011535.1_dup1,BGI_novel_T007781,BGI_novel_T007787,NM…
ARHGEF11	9826	NC_000001.11	-	156938417	156939910	156938417	156938513	156939547	156939910	343	62	298	11	3.94e-06	0.00125837	NA	NM_014784.3_dup1,XM_011510187.2_dup1,XM_011510186.2_dup1,XM_006711661.2_dup1,XM_017002922.1_dup1,XM_006711659.2_dup1,XM_017002924.1_dup1,NM_198236.2_dup1,XM_011510185.2_dup1,XM_017002923.1_dup1,XM_006711665.3_dup1,XM_006711662.2_dup1,XM_005245633.4_dup1,XM_017002921.1_dup1,XM_006711660.3_dup1,XM_017002920.1_dup1,XM_006711663.3_dup1,XM_011510189.2_dup1,XM_005245629.4_dup1
PRAME	23532	NT_187629.1	-	192468	193237	192468	192587	193201	193237	76	4	129	139	1.14e-08	6.54e-06	NA	NM_006115.4_dup1,NM_206955.2_dup1
WSB1	26118	NC_000017.11	+	27306781	27307919	27306781	27306882	27307743	27307919	660	388	708	177	6.14e-07	0.000274087	NA	BGI_novel_T018781,XR_001752470.1_dup1
USP21	27005	NC_000001.11	+	161164533	161164942	161164533	161164612	161164834	161164942	274	0	305	107	0	0	NA	NM_001014443.2_dup1,XM_017001040.1_dup1,BGI_novel_T001741,BGI_novel_T001743,NM_001319848.1_dup1,NM_012475.4_dup1
ATP5IF1	93974	NW_018654706.1	+	30004	31749	30004	30096	31404	31749	39	46	45	0	1.1e-08	6.54e-06	NA	NM_178190.2_dup1
LENG8	114823	NW_003571054.1	+	364827	368534	364827	365035	367279	368534	165	105	198	27	3.59e-05	0.0084775	NA	XM_011526415.2_dup1
HEXDC	284004	NC_000017.11	+	82439630	82441075	82439630	82440613	82440996	82441075	187	31	146	0	3.67e-07	0.000184106	NA	BGI_novel_T019623,BGI_novel_T019622,XR_001752496.1_dup1
	102724135	NC_000015.10	+	84470543	84475260	84470543	84470694	84472355	84475260	391	2	419	33	1.17e-06	0.000428903	NA	BGI_novel_T017056
